# Supplementary material for: Multi-dimensional genomic analysis of myoepithelial carcinoma identifies prevalent oncogenic gene fusions
Source: PubMed Central journal article supplement (PMC5662567; doi:10.1038/s41467-017-01178-z), 2017-10-30
Supplement: 41467_2017_1178_MOESM1_ESM.pdf [file 41467_2017_1178_MOESM1_ESM.pdf]

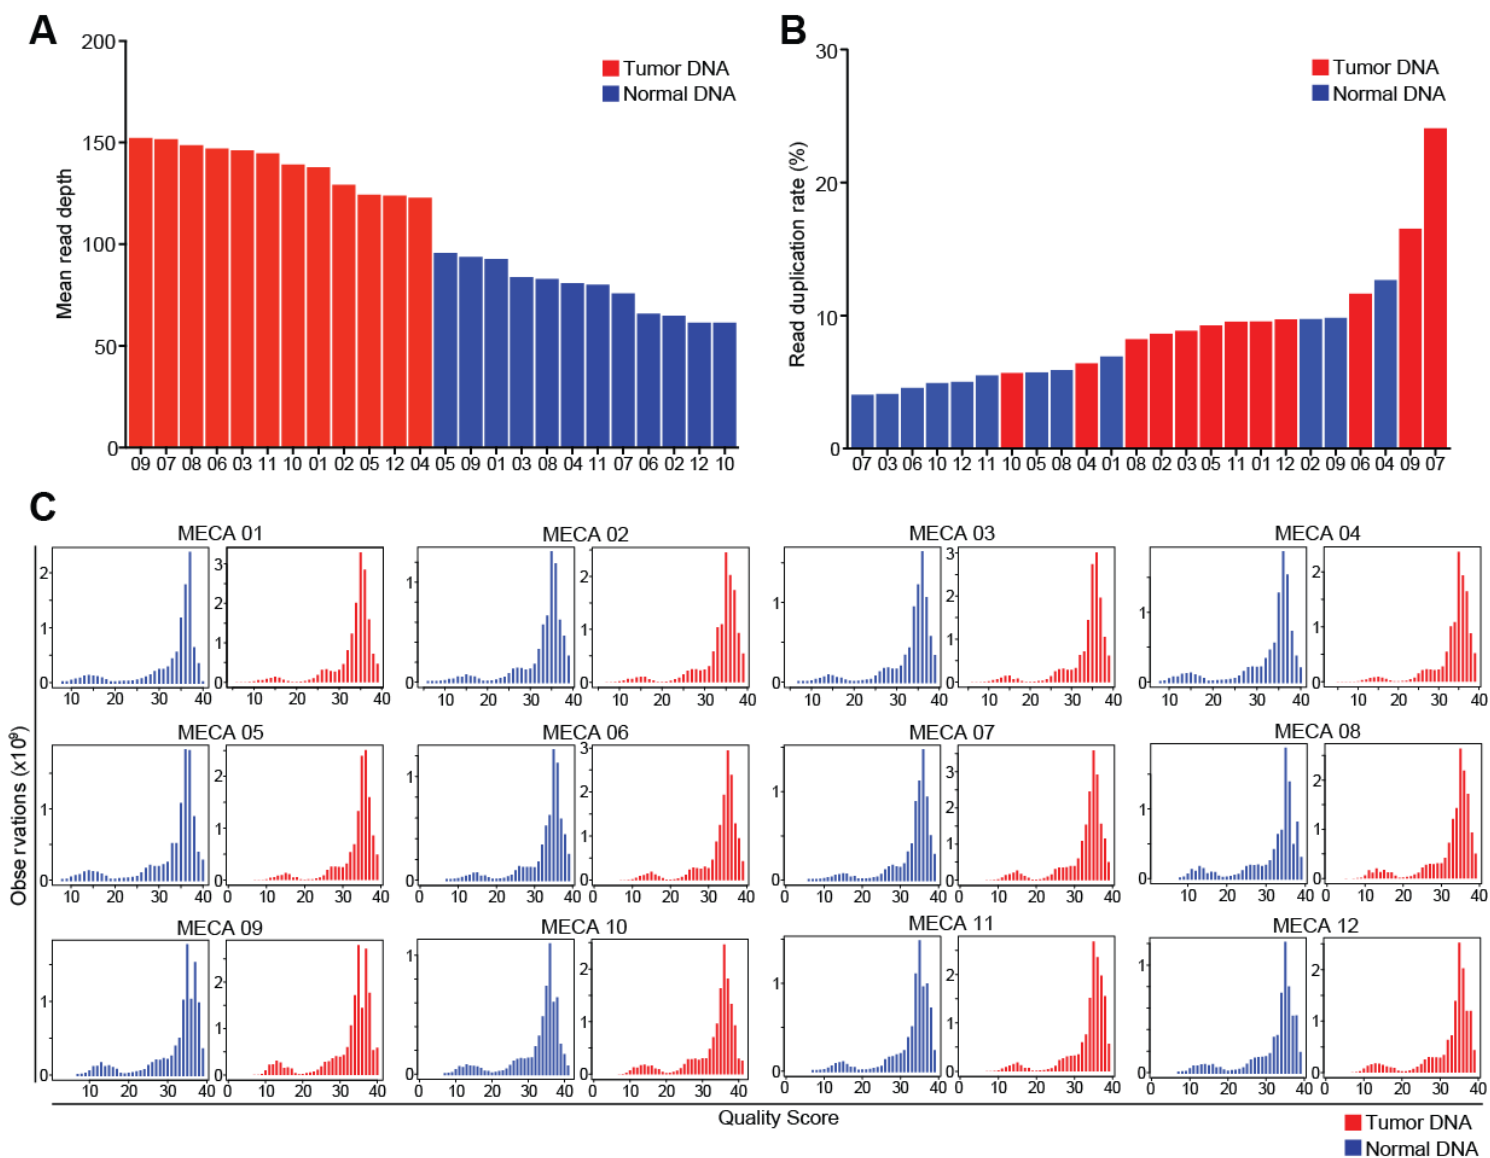

**Supplementary Figure 1.** Coverage and quality of whole-exome sequencing analysis in cohort 1. (A) Mean read depth, (B) read duplication rate, and (C) read quality score distribution, in tumor and normal DNA of the 12 cases.

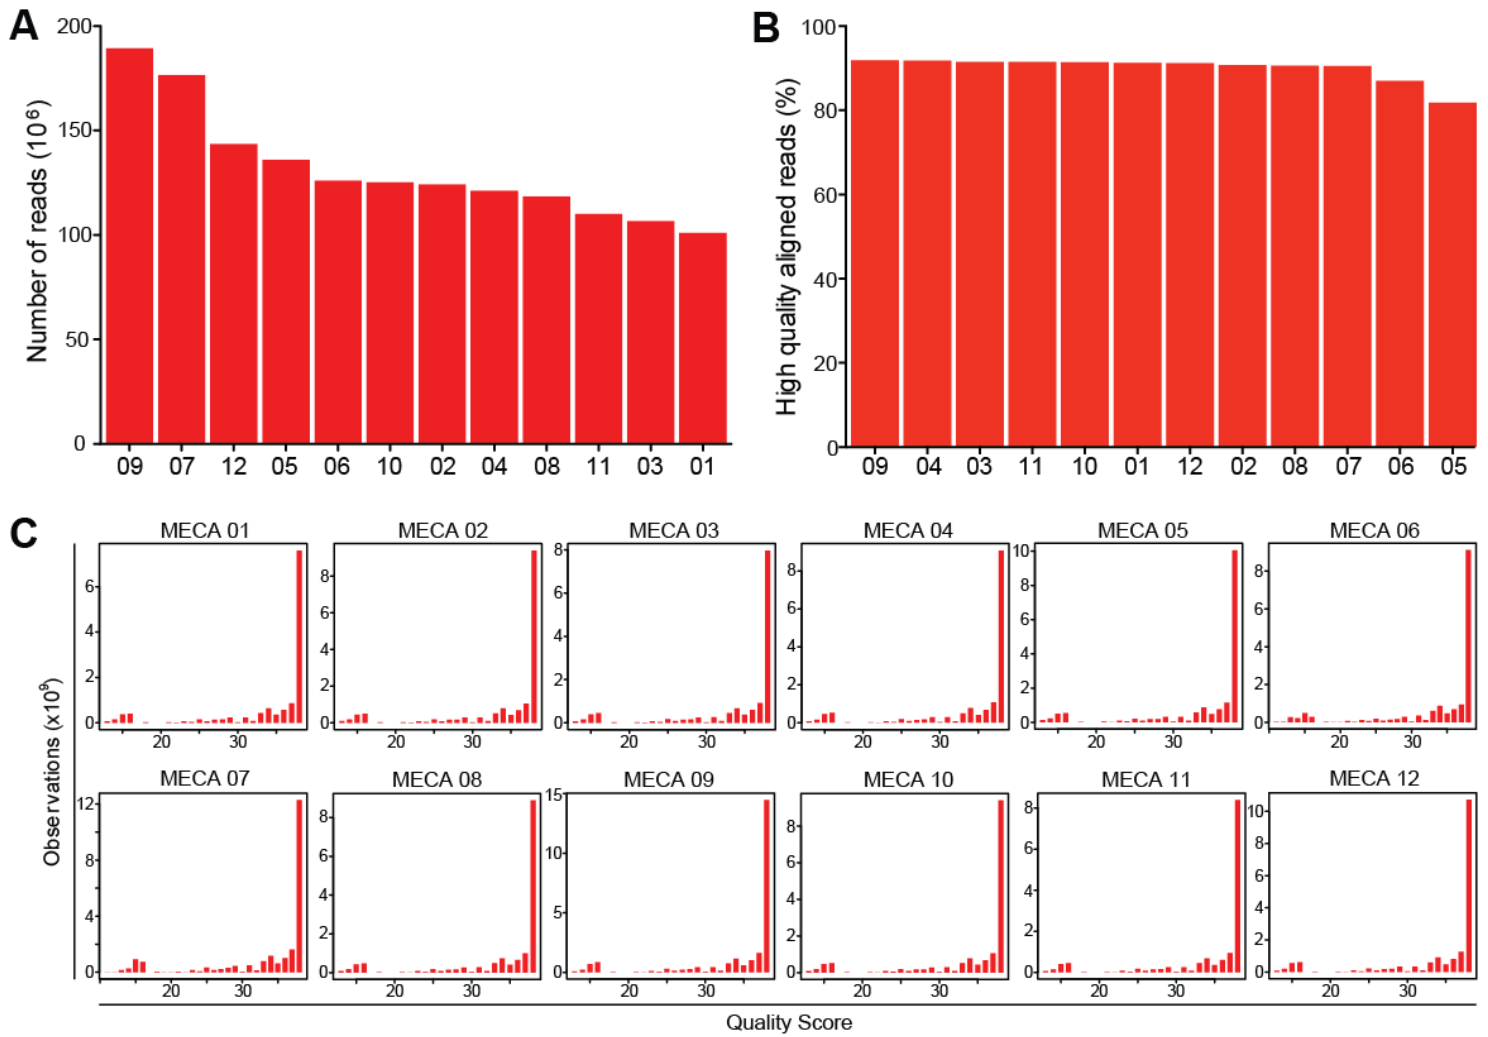

**Supplementary Figure 2.** Depth and quality of RNA sequencing analysis in cohort 1. (A) Number of reads that passed Illumina’s filter. (B) Percent of the reads passing filter that were aligned to the mapping sequence with a mapping quality of Q20 or higher, leading to a <1% probability that the alignment is wrong. (C) Read quality score distribution for each case.



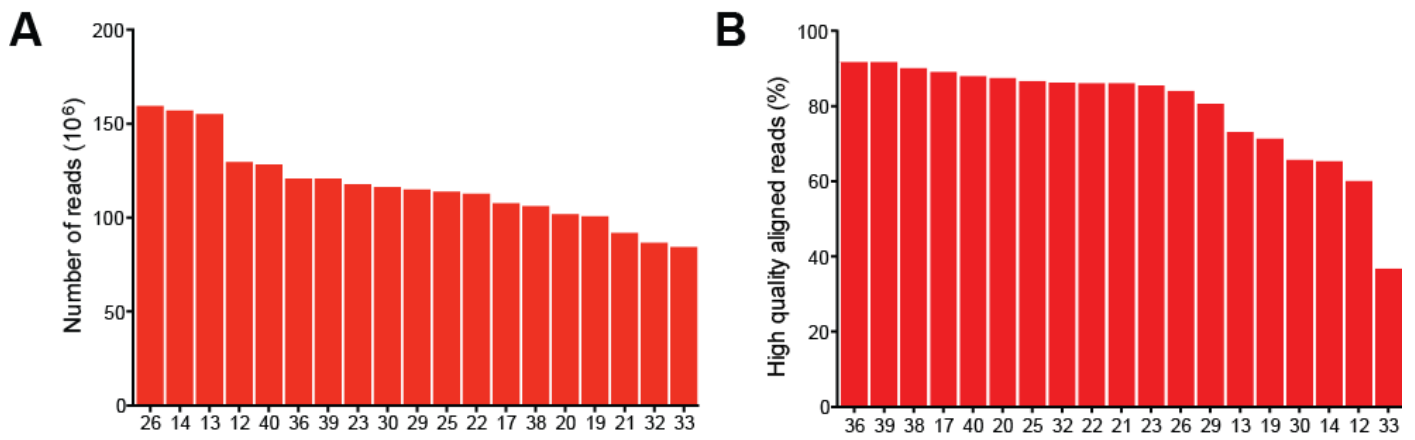

**Supplementary Figure 3.** Depth and quality of RNA sequencing analysis in cohort 2. (A) Number of reads that passed Illumina’s filter. (B) Percent of the reads passing filter that were aligned to the mapping sequence with a mapping quality of Q20 or higher, leading to a <1% probability that the alignment is wrong.

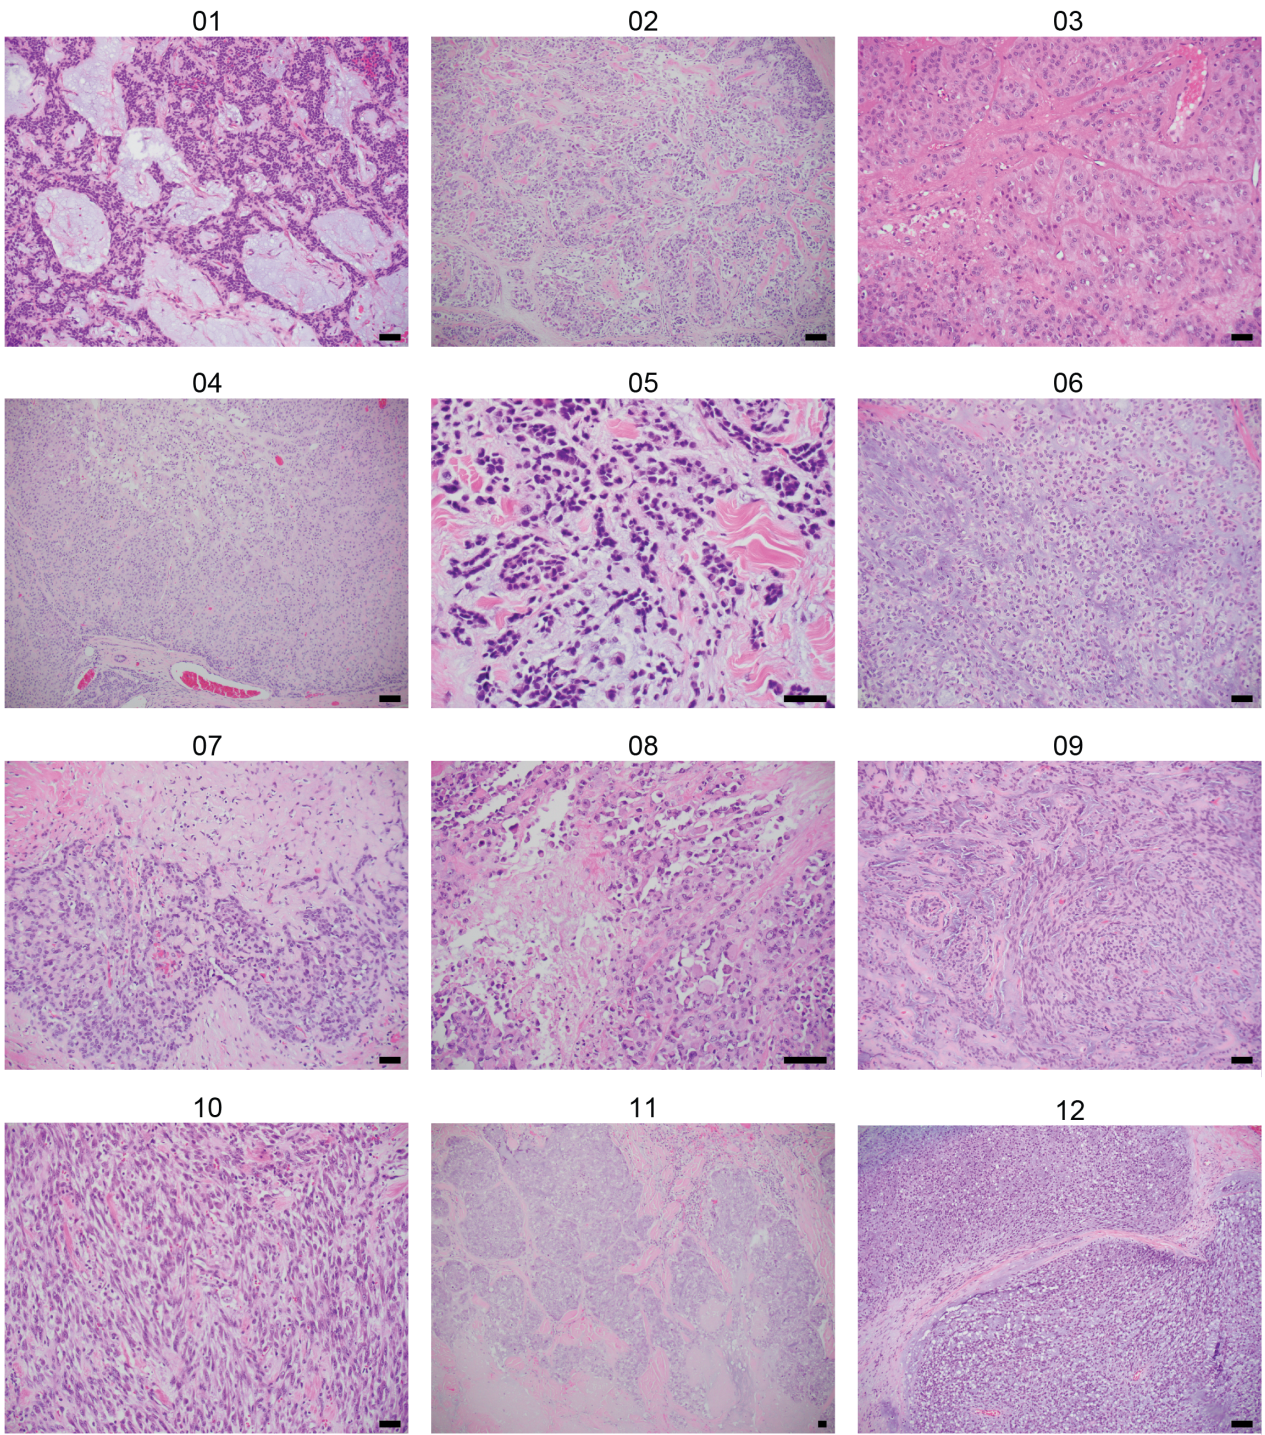

**Supplementary Figure 4.** H/E staining of MECA01-MECA12. Scale bars, 100  $\mu$ m.



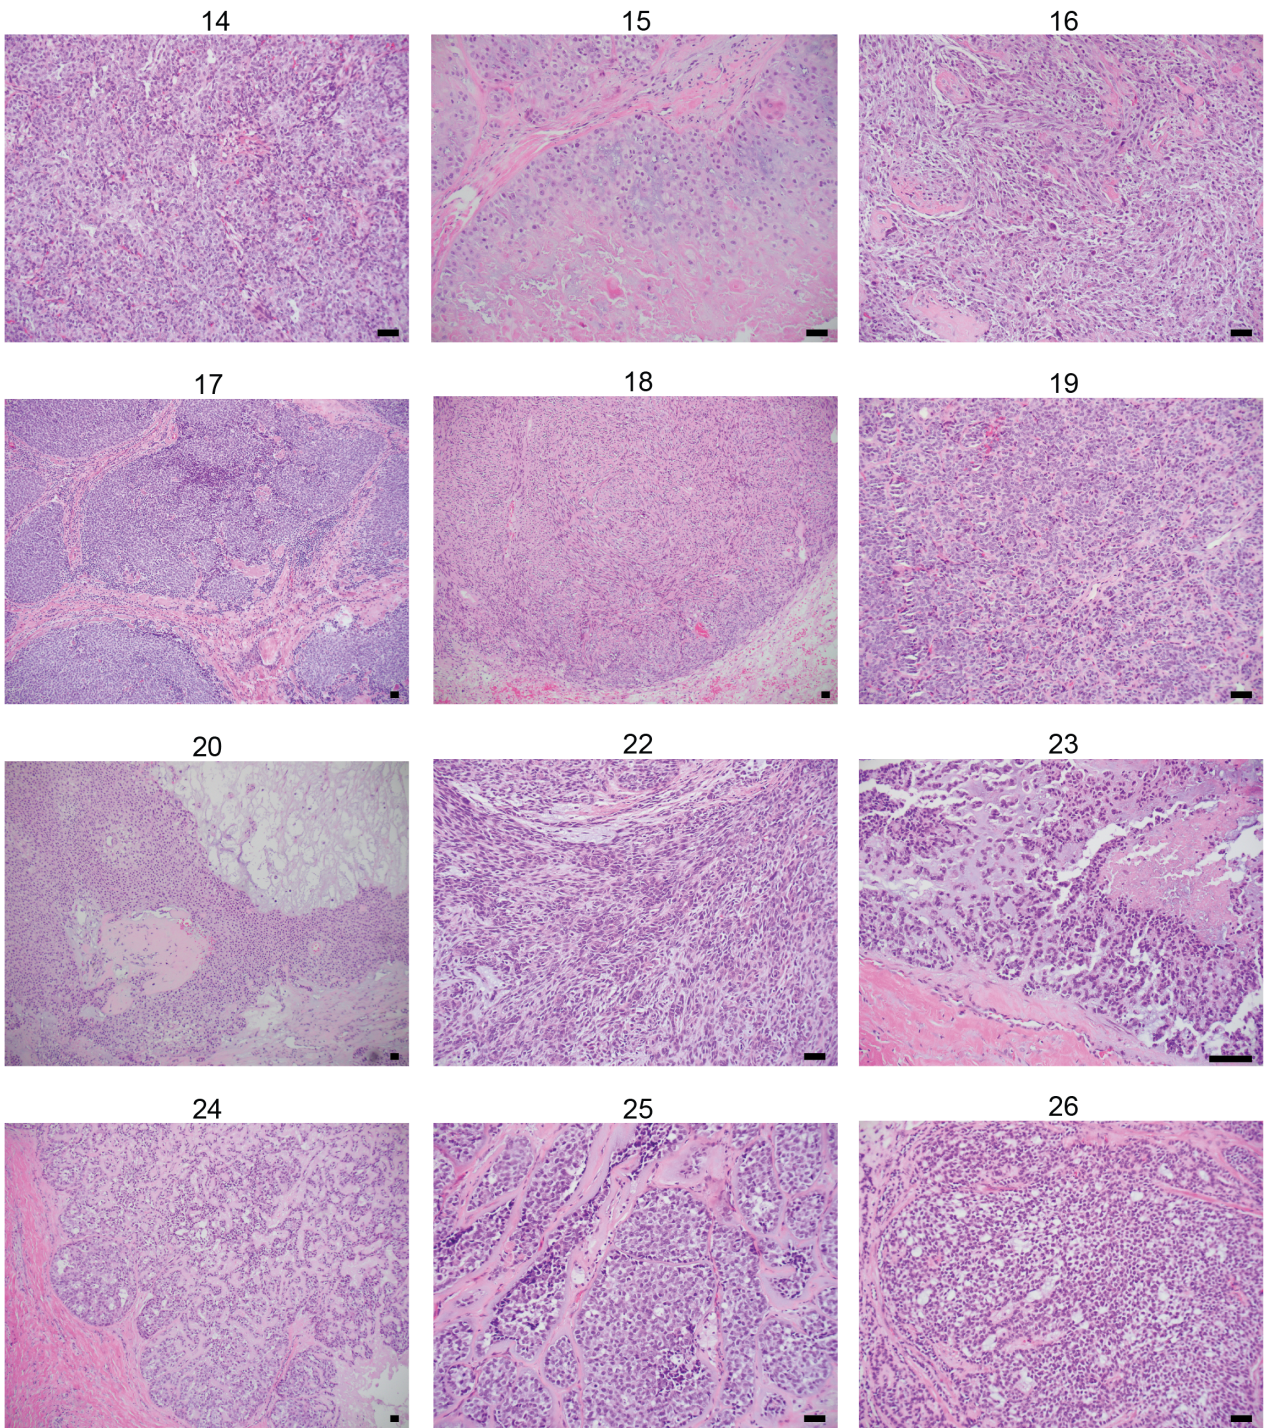

**Supplementary Figure 5.** H/E staining of MECA14-MECA20 and MECA22-MECA26. Scale bars, 100  $\mu$ m.



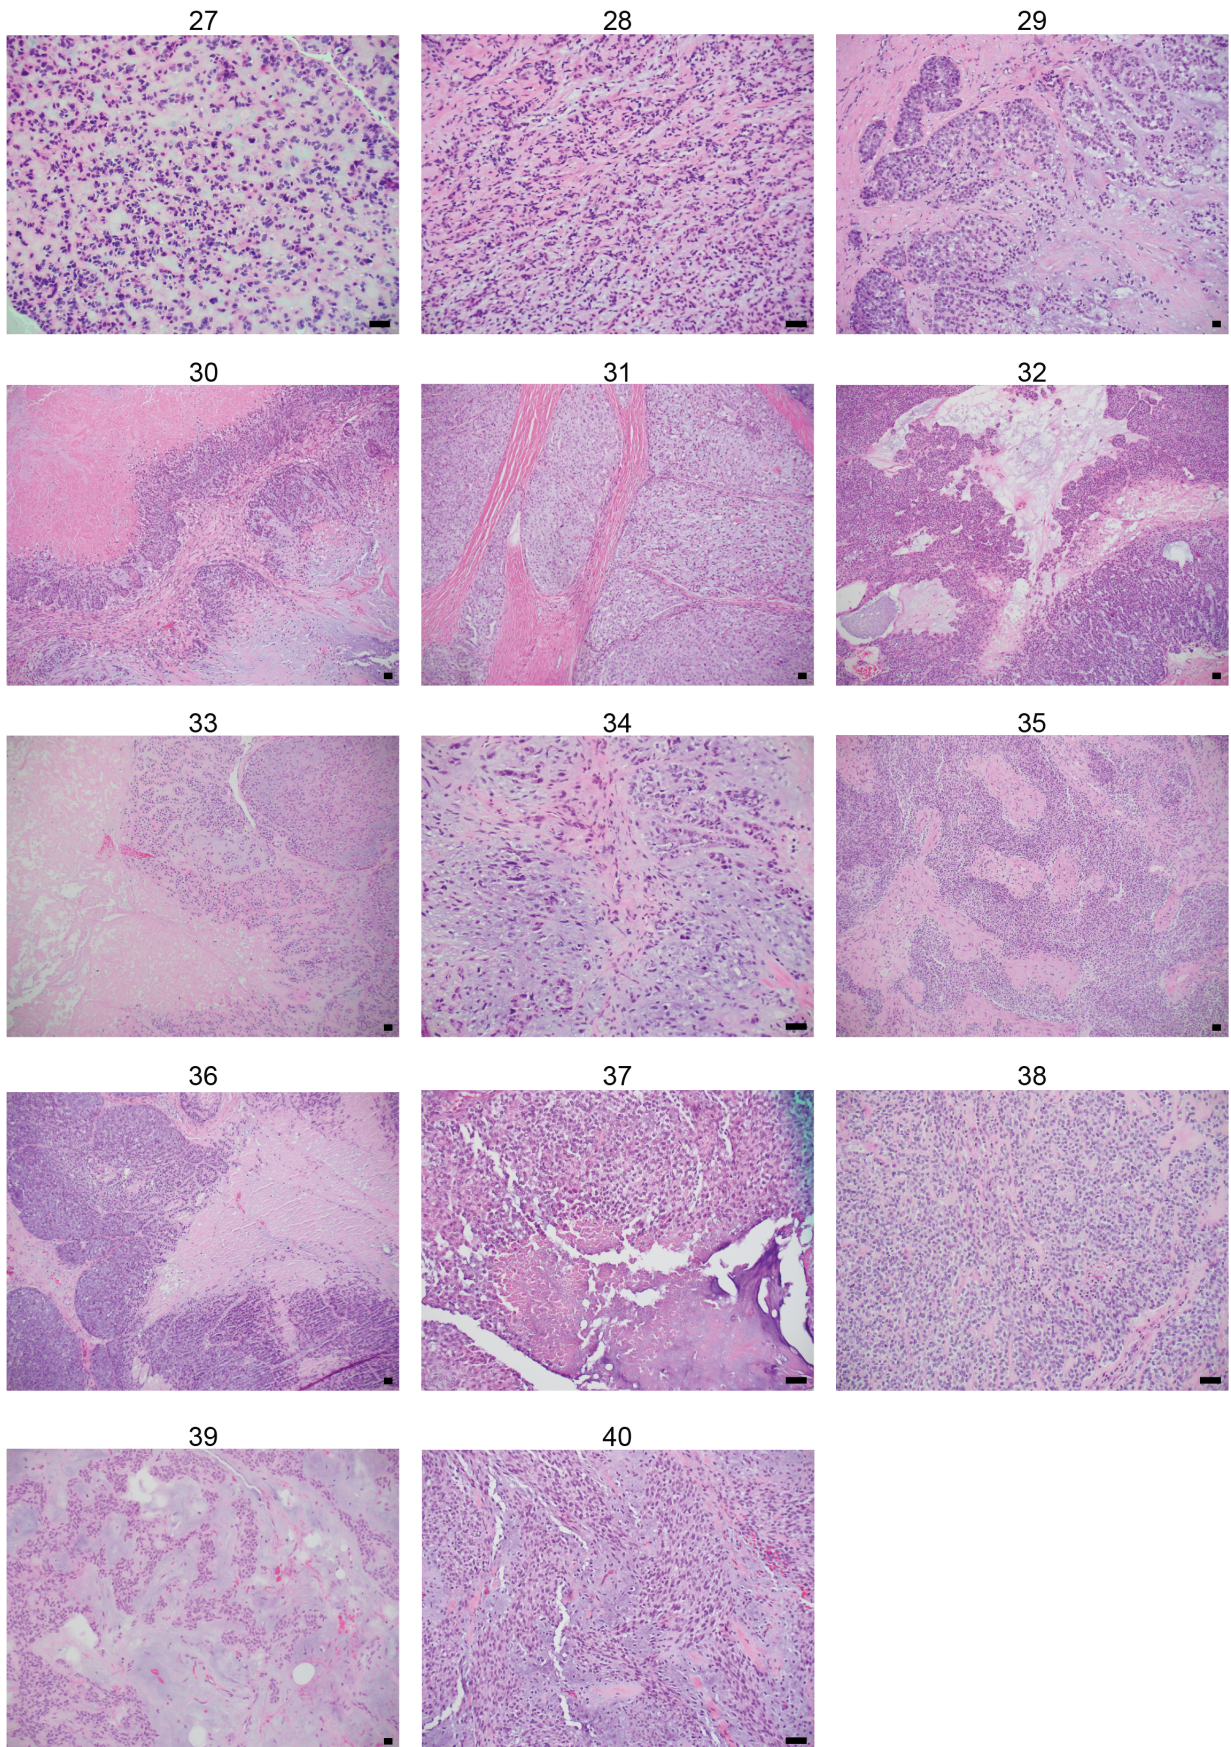

**Supplementary Figure 6.** H/E staining of MECA27-MECA40. Scale bars, 100  $\mu\text{m}$ .

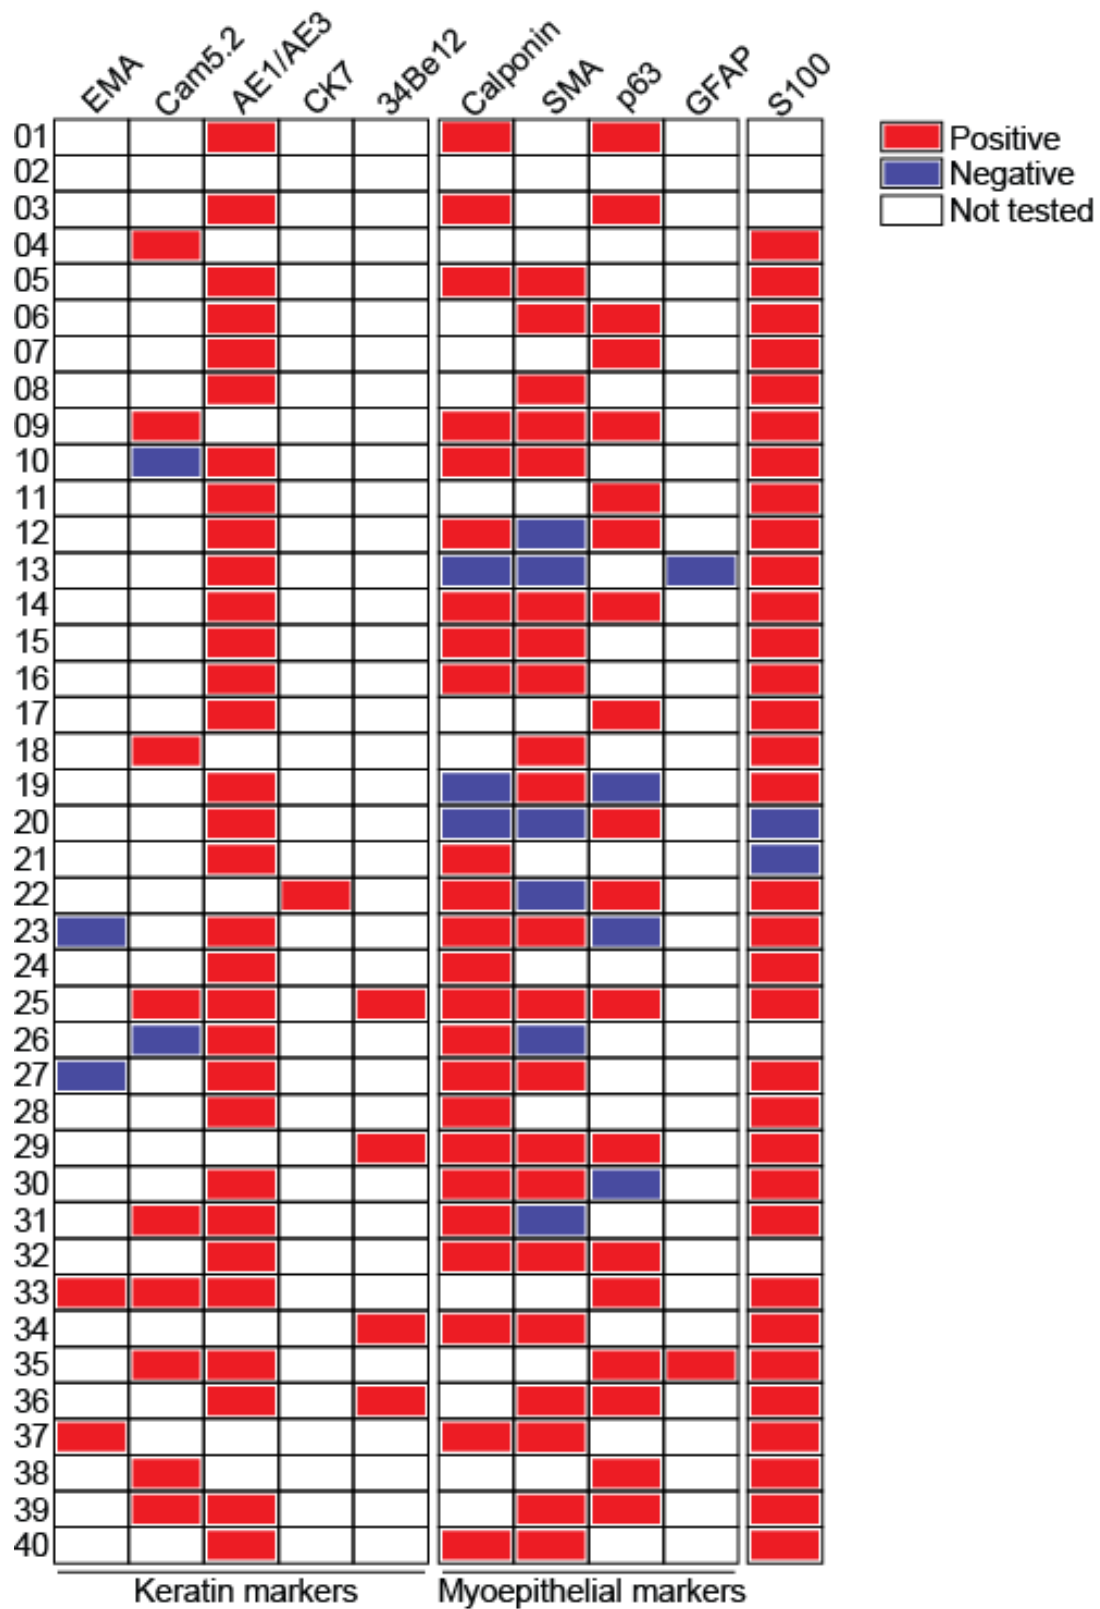

**Supplementary Figure 7.** Diagnostic IHC analyses. MECAs are positive for at least one keratin marker, and at least one myoepithelial marker or S100. MECA02 was not available for IHC but showed typical MECA histology.

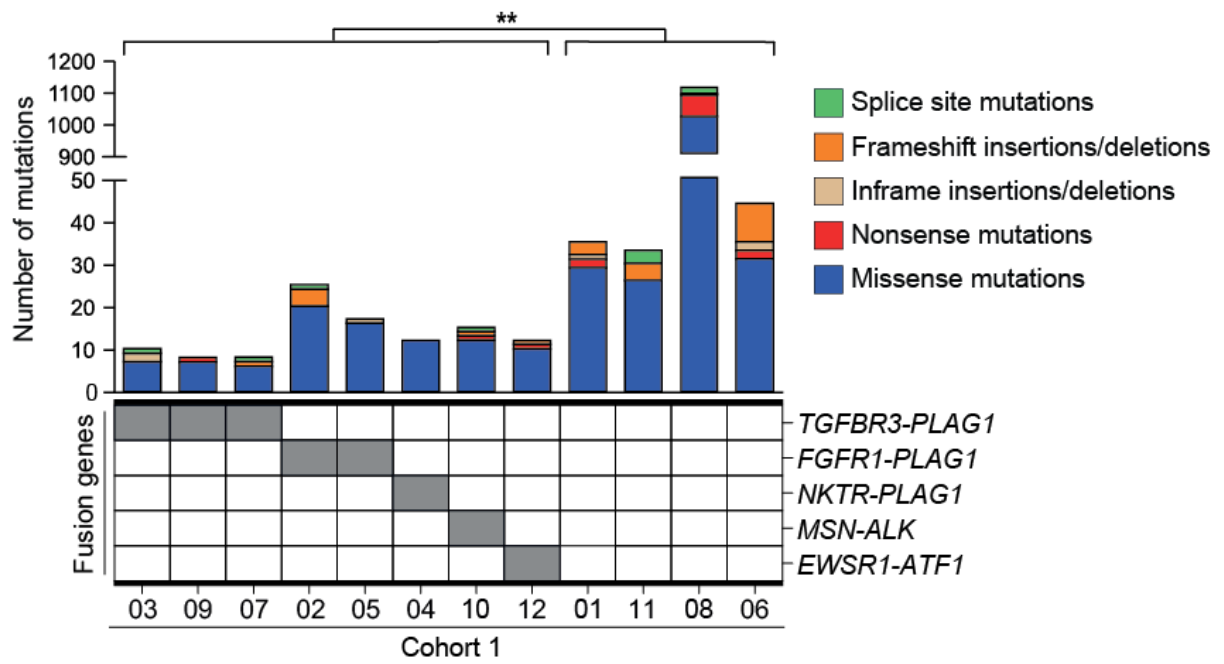

**Supplementary Figure 8.** Mutation spectrum in cohort 1.  $**P < 0.01$  (number of mutations in fusion gene positive versus -negative cases); Mann-Whitney test.



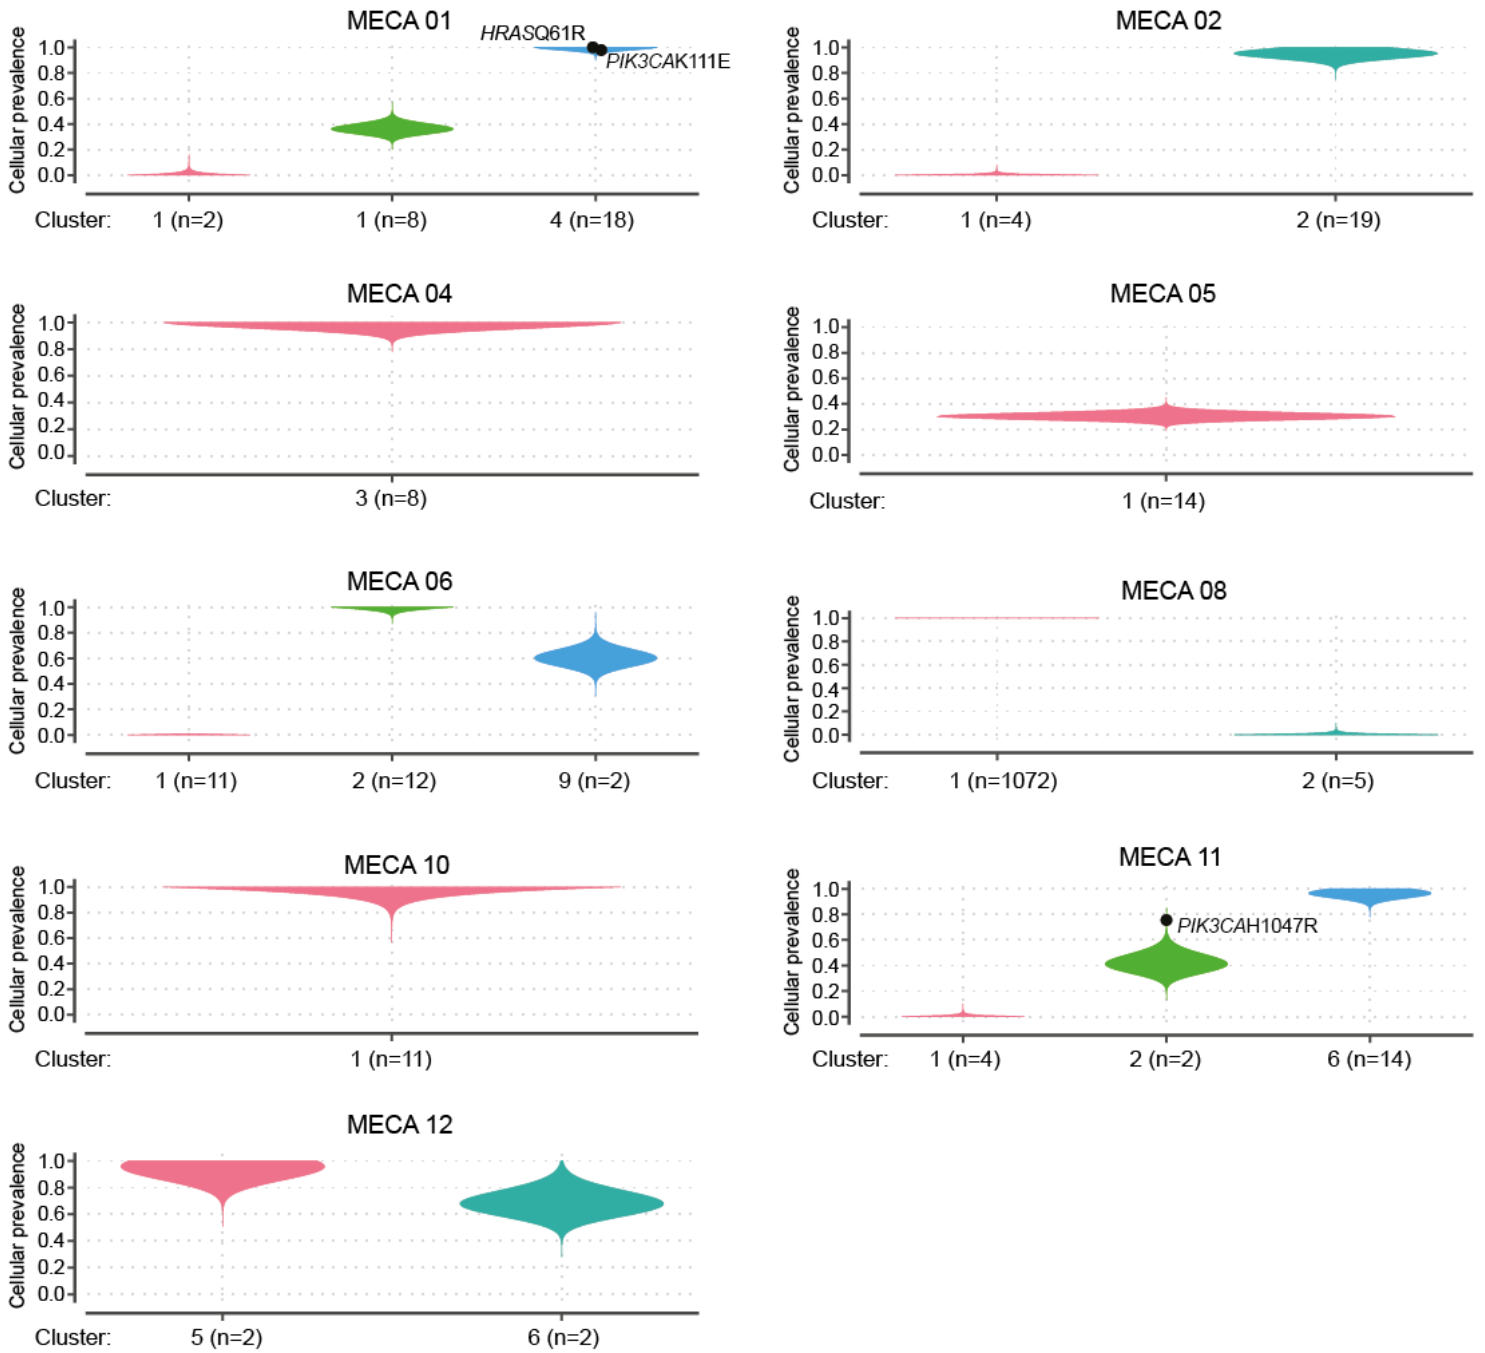

**Supplementary Figure 9.** Analysis of intratumor mutational heterogeneity in cohort 1. With clustering of cancer cellular prevalence by PyClone (see Methods). Two tumors had less than 10 mutations and were therefore excluded from the analysis. n, number of mutations per cluster.

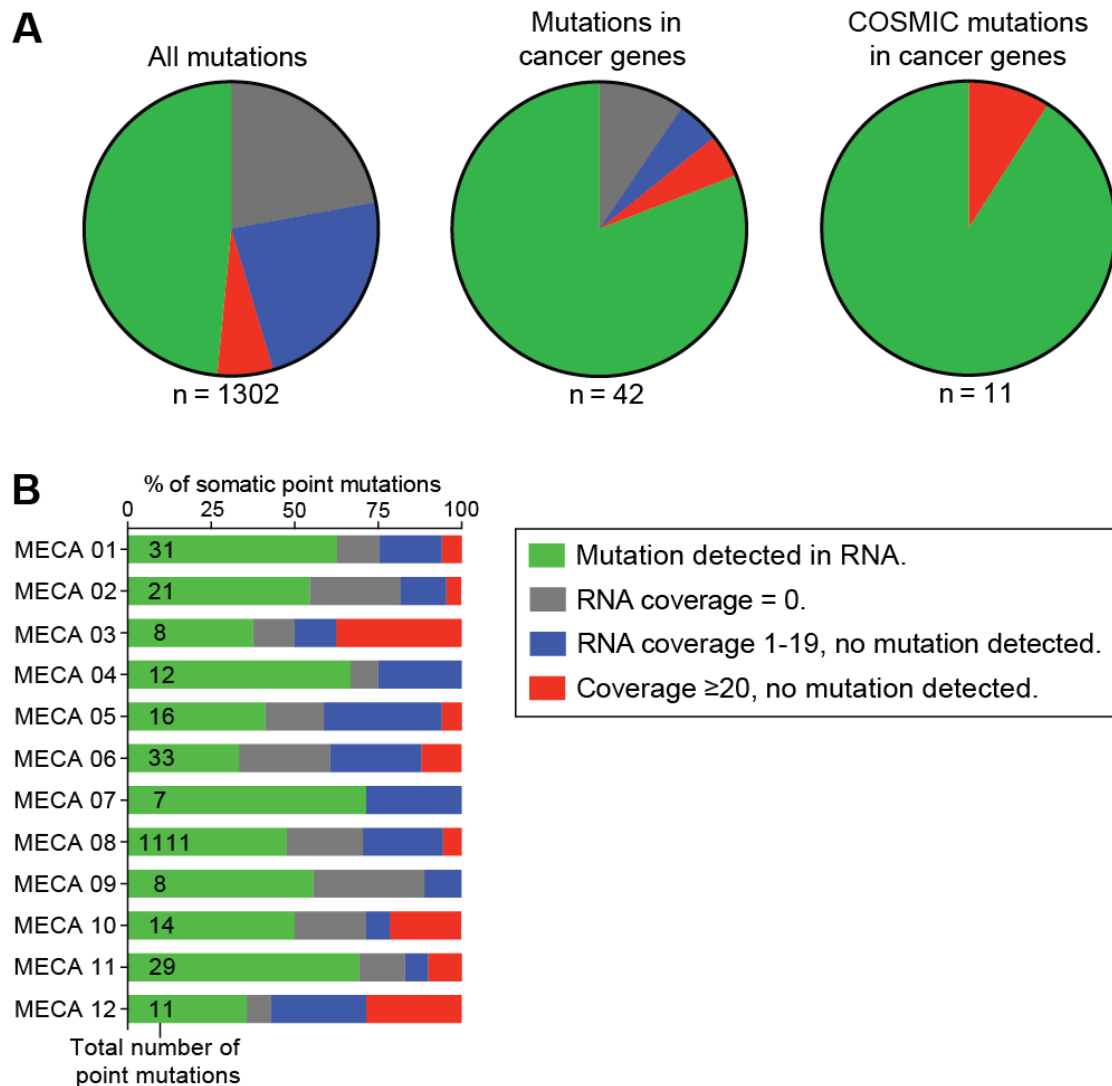

**Supplementary Figure 10.** Detection of somatic mutations in cohort 1 using RNA sequencing. (A) Pie charts showing all (left), cancer gene mutations only (center) or COSMIC mutations in cancer genes only (right). \*Cancer genes are defined by the COSMIC cancer Gene Census list ([cancer.sanger.ac.uk/census](http://cancer.sanger.ac.uk/census)). (B) Number of somatic point mutations and percent of mutations detected by RNA sequencing for each individual case.



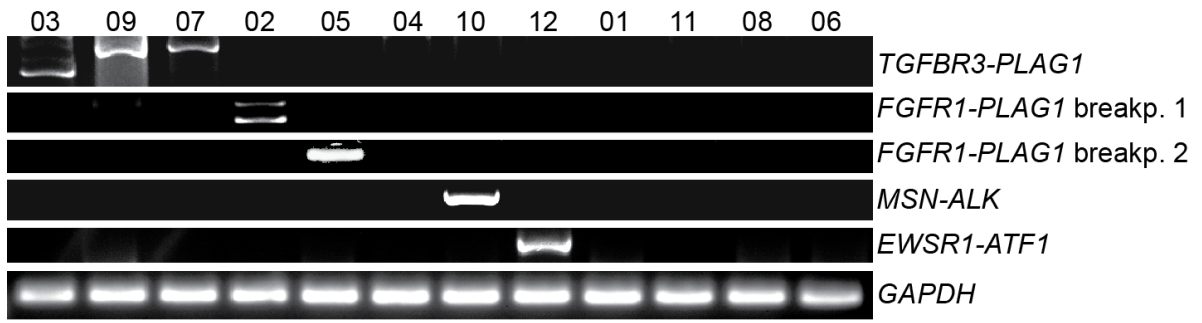

**Supplementary Figure 11.** Confirmation of fusion genes in cohort 1 using RT-PCR.  
For primer sequences, see Supplementary Table 1.

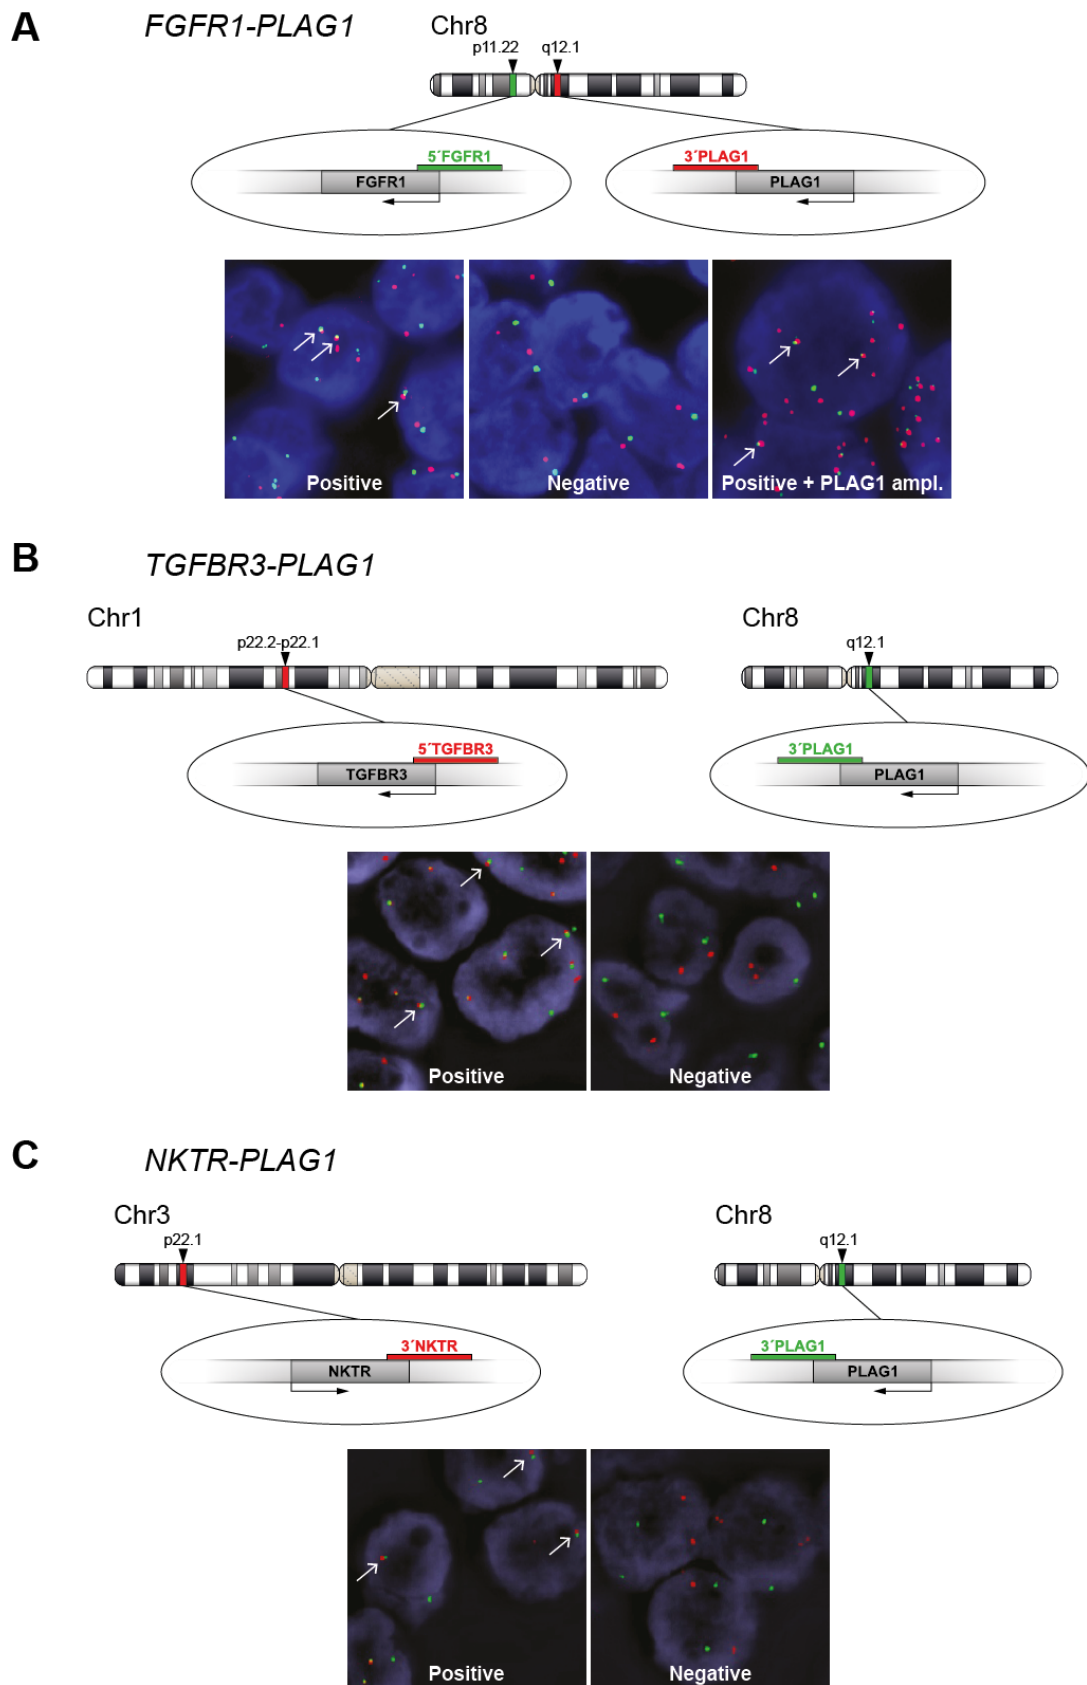

**Supplementary Figure 12.** Confirmation of *PLAG1* fusion genes in cohort 1 using FISH. White arrows show co-localization of the two probes, consistent with fusion gene formation.

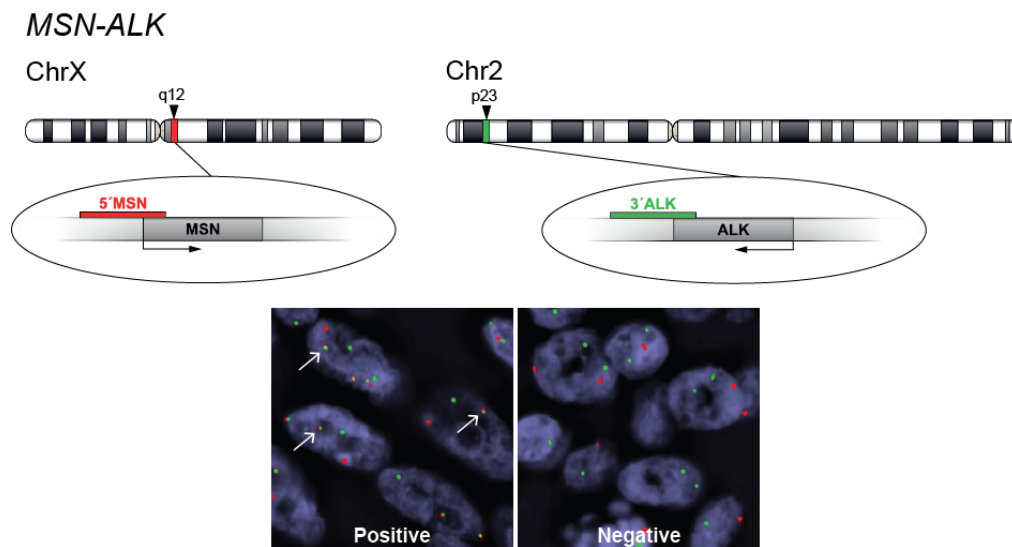

**Supplementary Figure 13.** Confirmation of the *MSN-ALK* fusion gene using FISH. White arrows show co-localization of the two probes, suggesting fusion gene formation.

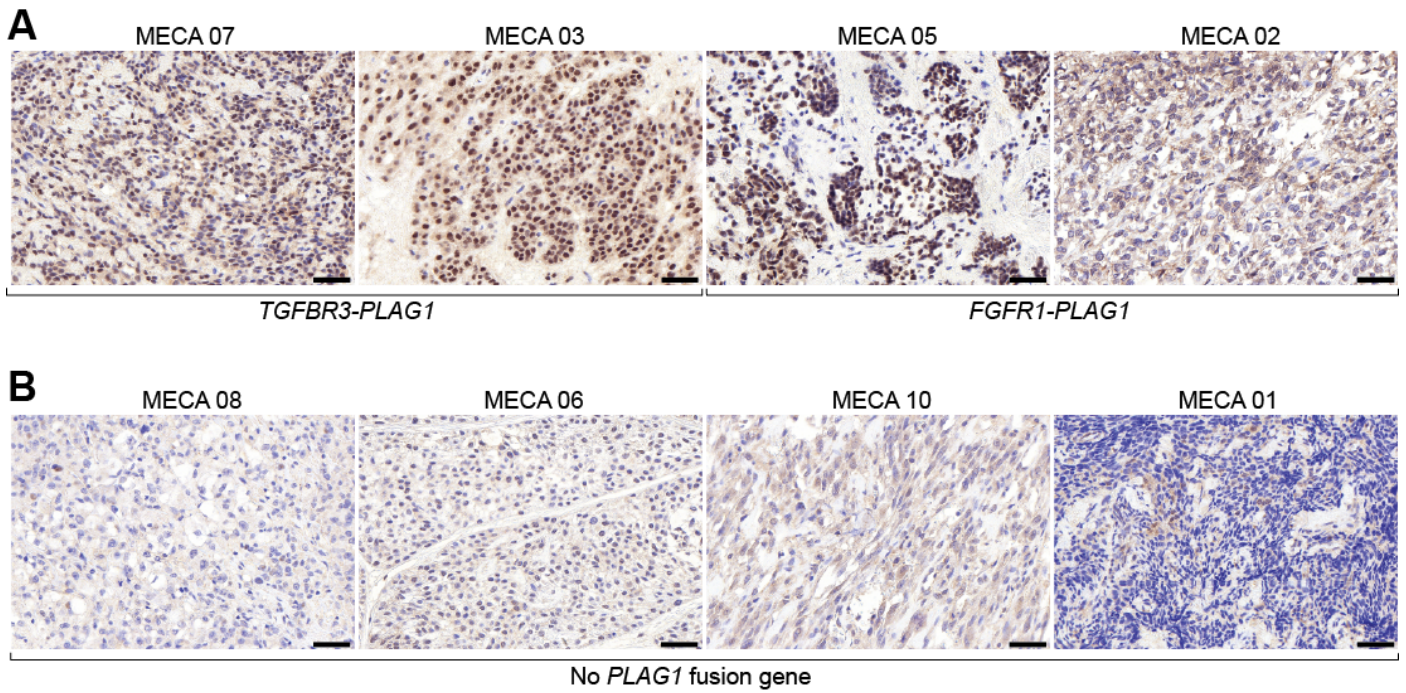

**Supplementary Figure 14.** Nuclear accumulation of PLAG1 protein in tumors harboring *PLAG1* fusion genes. Immunohistochemistry showing (A) 4 tumors with *TGFBR3-PLAG1* or *NKTR-PLAG1* fusion genes, and (B) 4 randomly selected tumors negative for *PLAG1* fusion genes. Scale bars, 50  $\mu$ m.

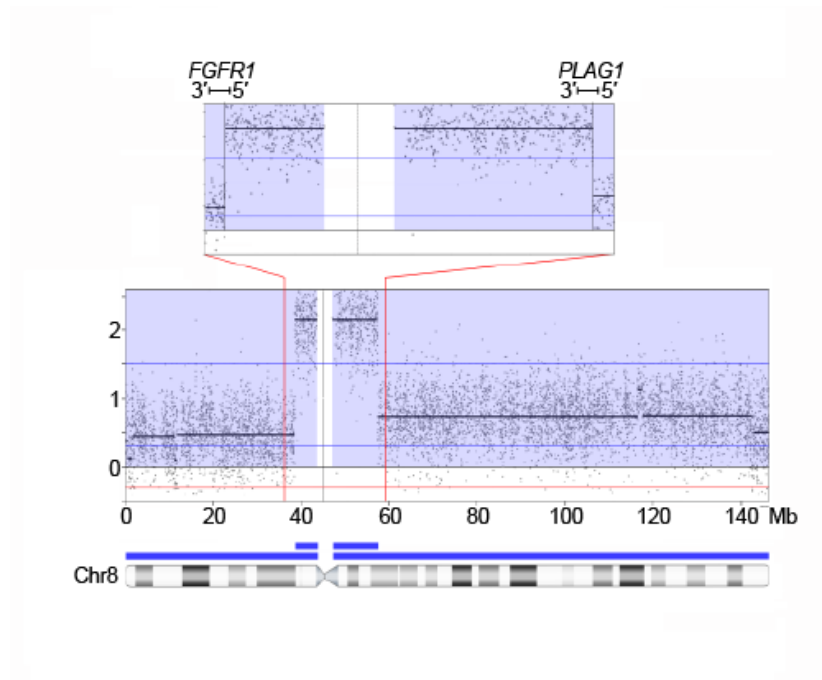

**Supplementary Figure 15.** Ring chromosome 8 (r8) formation in an *FGFR1-PLAG1* positive case of MECA ex-PA. Array-CGH data showing amplification of the centromeric portion of chromosome 8 with breakpoints in *PLAG1* and *FGFR1*, consistent with r8 formation.



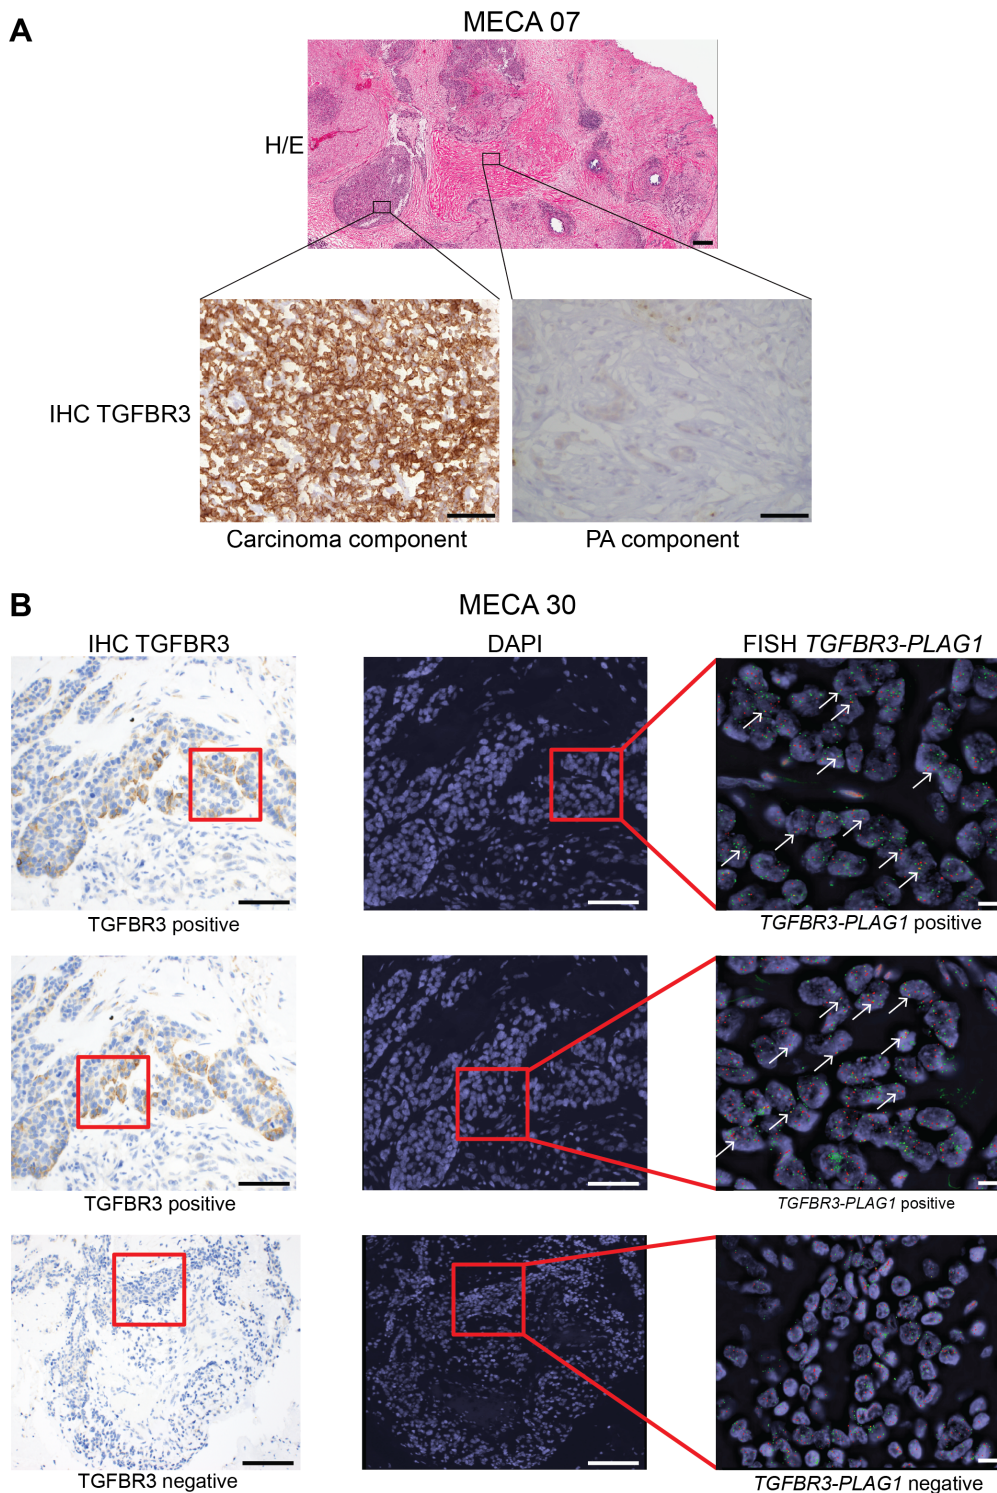

**Supplementary Figure 16.** Focally positive TGFBR3 staining in MECA ex-PA cases positive for the *TGFBR3-PLAG1* fusion gene. (A) Case 07; TGFBR3 staining is positive in the carcinoma and negative in the PA component. Scale bars, 1 mm (top) and 100  $\mu$ m (bottom). (B) Case 30; co-localization of the *TGFBR3-PLAG1* fusion detected by FISH and positive TGFBR3 by IHC. Scale bars, 100  $\mu$ m (left and middle panel) and 10  $\mu$ m (right panel).

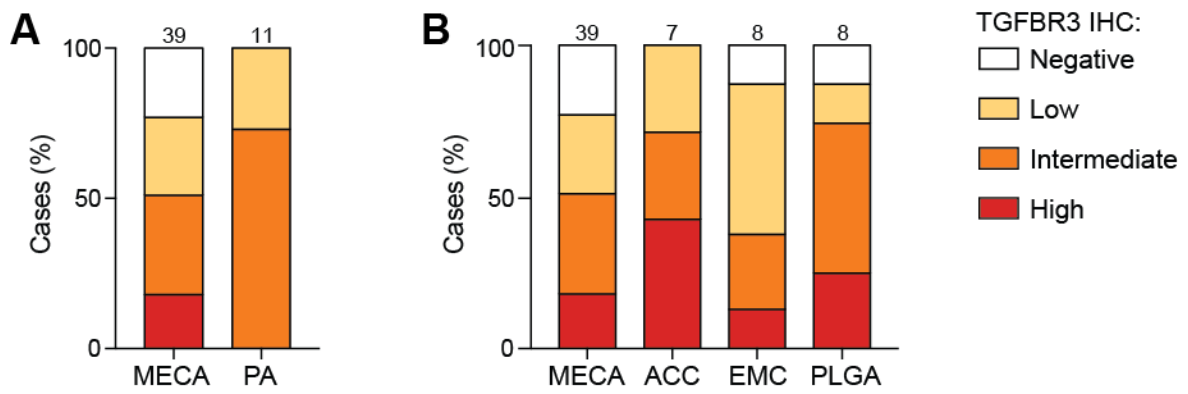

**Supplementary Figure 17.** Quantification of TGFBR3 IHC analysis in different types of salivary gland tumors. Number of analyzed cases for each tumor type is stated on top of bars. (A) MECA versus PA. (B) MECA versus other salivary gland cancers. ACC, adenoid cystic carcinoma; EMC, epithelial myoepithelial carcinoma; PLGA, polymorphic low-grade adenocarcinoma.  $P$  (high TGFBR3) = n.s. Fisher's exact test.

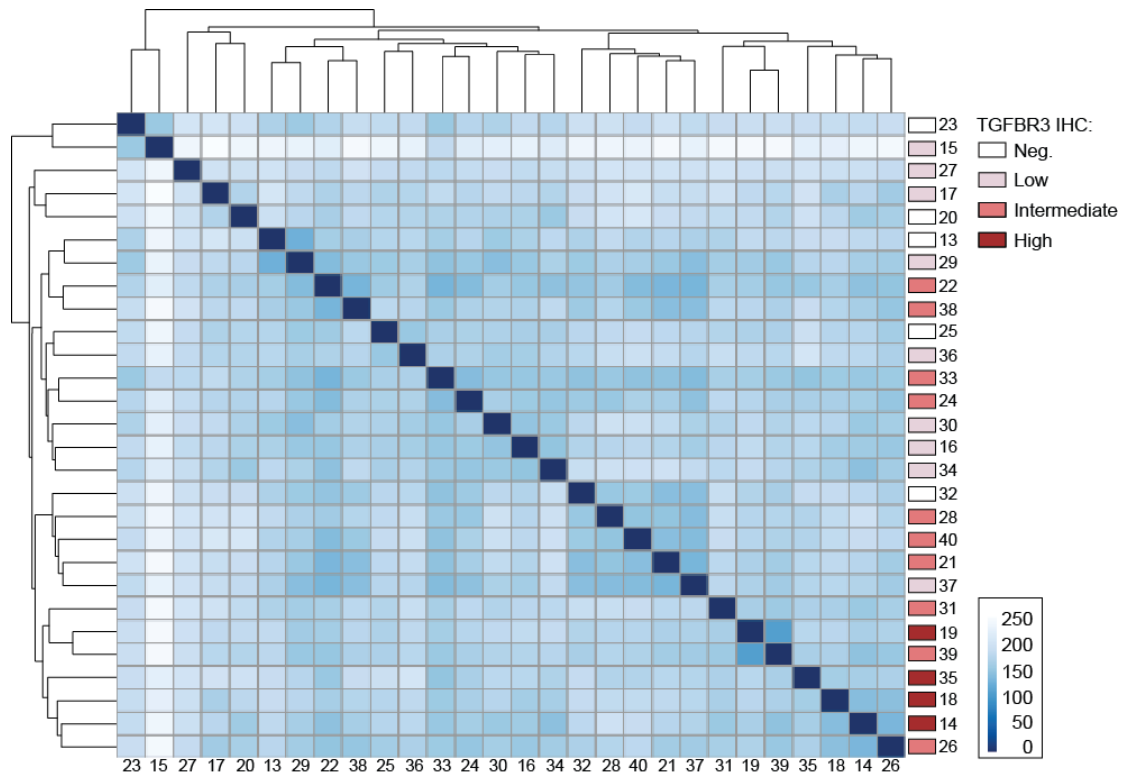

**Supplementary Figure 18.** Poisson sample clustering based on gene expression in cohort 2. Annotated by TGFBR3 IHC results.



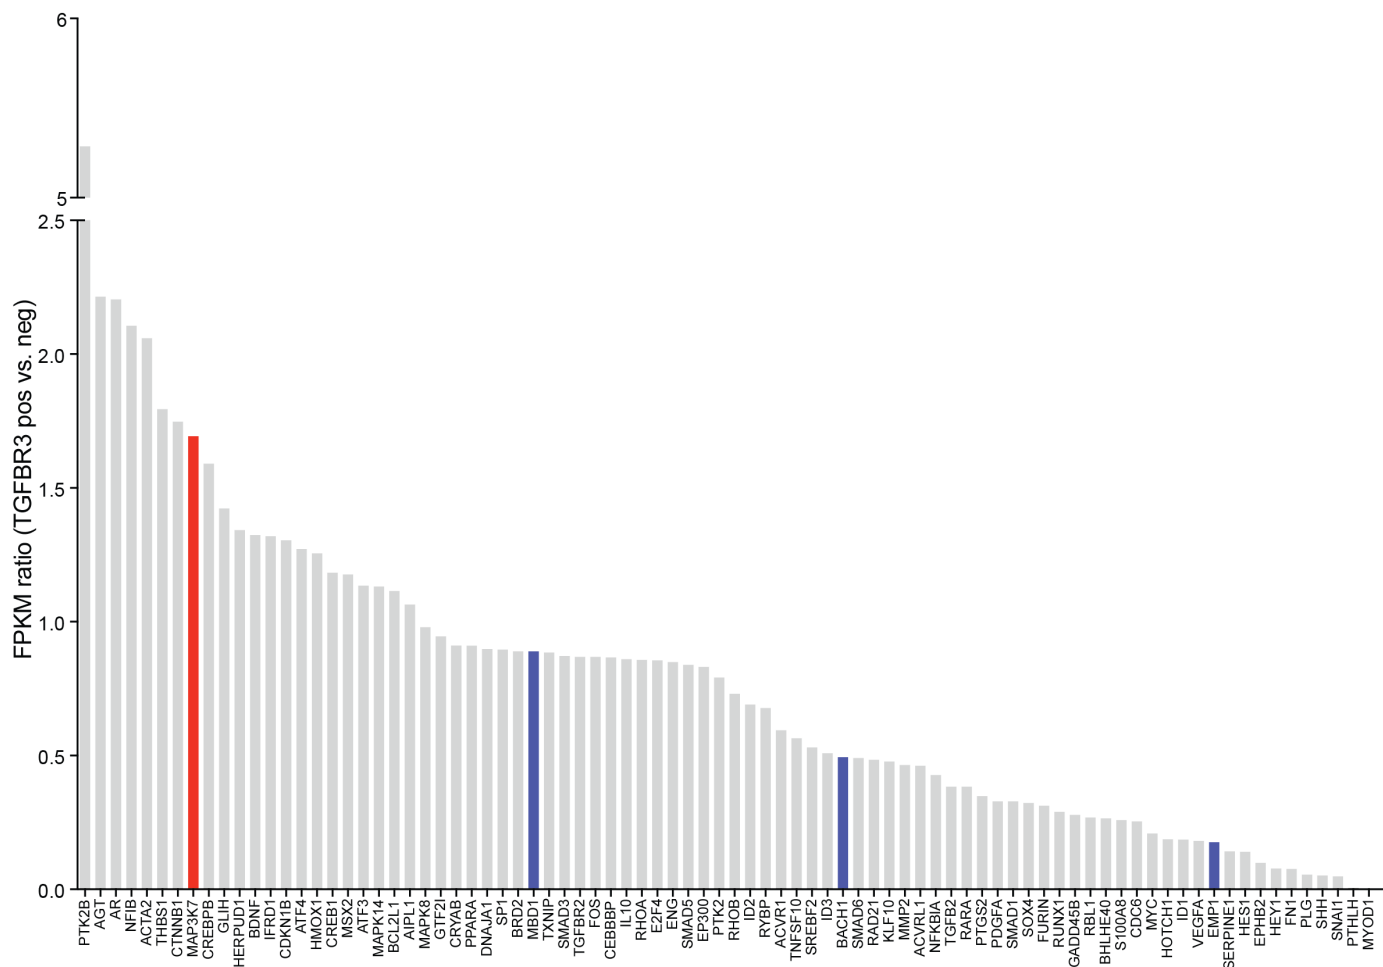

**Supplementary Figure 19.** Effect of TGFBR3 overexpression on TGF- $\beta$  signaling in MECA. Expression of 84 TGF- $\beta$  pathway effector genes<sup>1</sup>, shown as ratio between tumors with high (n = 4) versus those with negative, low or intermediate (n = 8) TGFBR3 IHC levels. Red and blue bars denote genes significantly up- and downregulated in TGFBR3 high tumors, respectively (Student's t test,  $P < 0.05$ ). However, the expression of these genes was not significantly different between the groups when adjusting for multiple comparisons. The tumors in cohort 2 were excluded from this analysis, since FFPE preservation may affect mRNA levels.

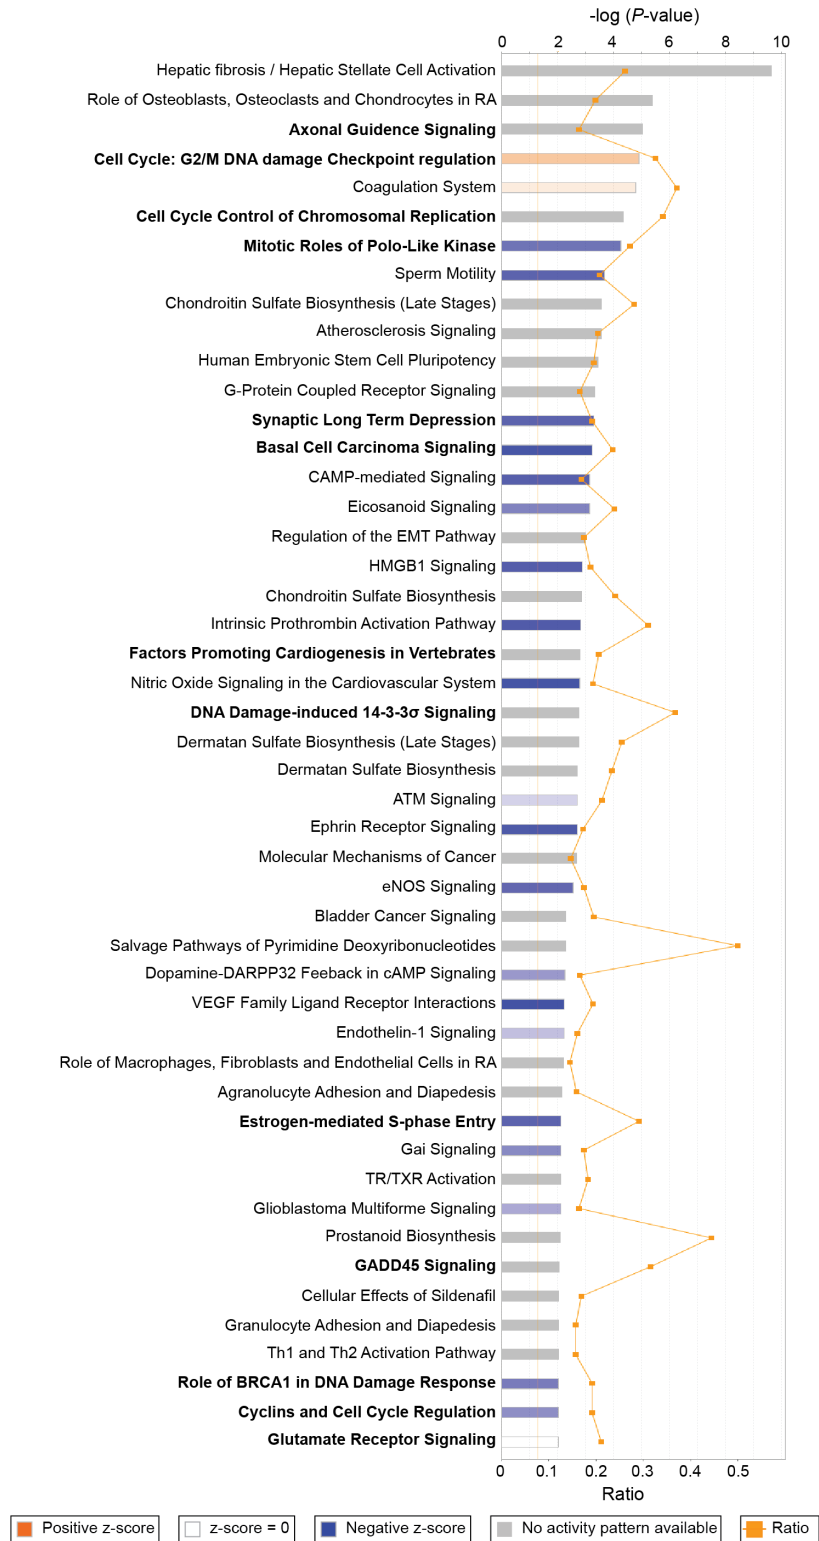

**Supplementary Figure 20.** Effect of TGFBR3 overexpression on signaling pathways in MECA. Ingenuity pathway analysis<sup>1</sup> of cohort 1 tumors with high (n = 4) versus those with negative, low or intermediate (n = 8) TGFBR3 IHC levels. Pathways with significantly different activity between the groups ( $P < 0.01$ ) are shown, ranked by  $P$ -value. Pathways in bold were also significantly different ( $P < 0.01$ ) in TGFBR3 high versus negative, low or intermediate tumors in cohort 2.

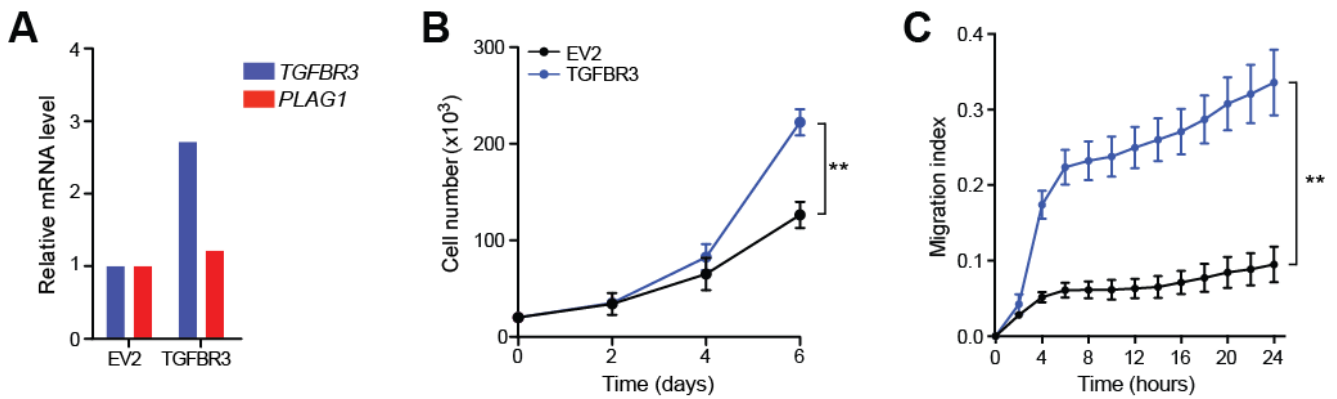

**Supplementary Figure 21.** Overexpression of *TGFBR3* causes increased proliferation and migration of TCG580 cells, which are defined by a *PLAG1* fusion but normal *TGFBR3*. (A) RT-QPCR showing relative *TGFBR3* and *PLAG1* mRNA levels. Data are mean expression normalized to EV2 levels, using 3 technical replicates/group (B) Proliferation of cells infected with denoted constructs. Data are mean  $\pm$  SEM, using 3 technical replicates/group. The experiment was replicated 2 times. (C) Migration of cells infected with denoted constructs. Data are mean  $\pm$  SEM, using 4 technical replicates/group. The experiment was replicated 2 times.  $**P < 0.01$ ; 2-way ANOVA.

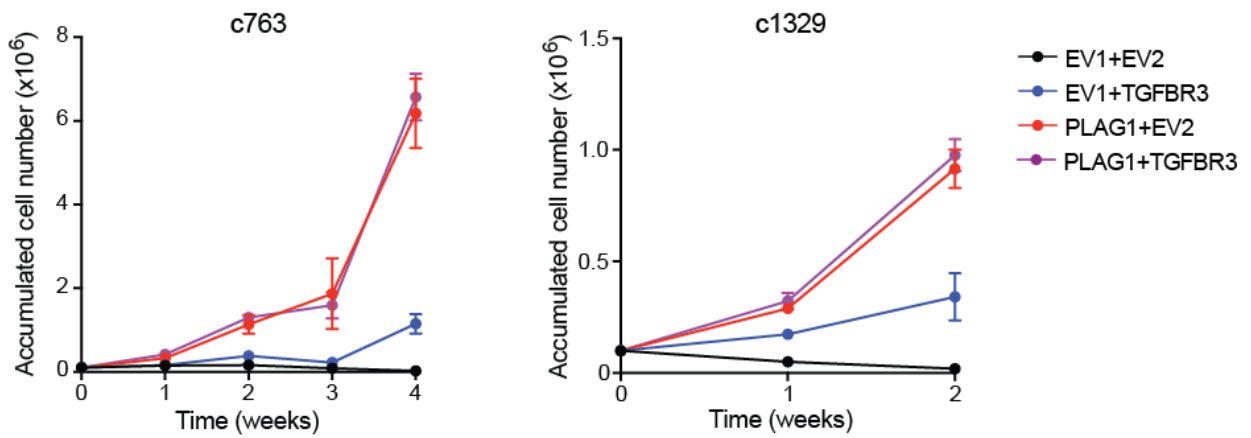

**Supplementary Figure 22.** Overexpression of *TGFB3* and/or *PLAG1* causes prolonged survival and growth of primary PA cells. Cells were grown on 6-well plates; 100.000 cells were replated after counting every week. Data are mean  $\pm$  SEM, using 3 technical replicates per time point, and was adjusted for previous replatings.

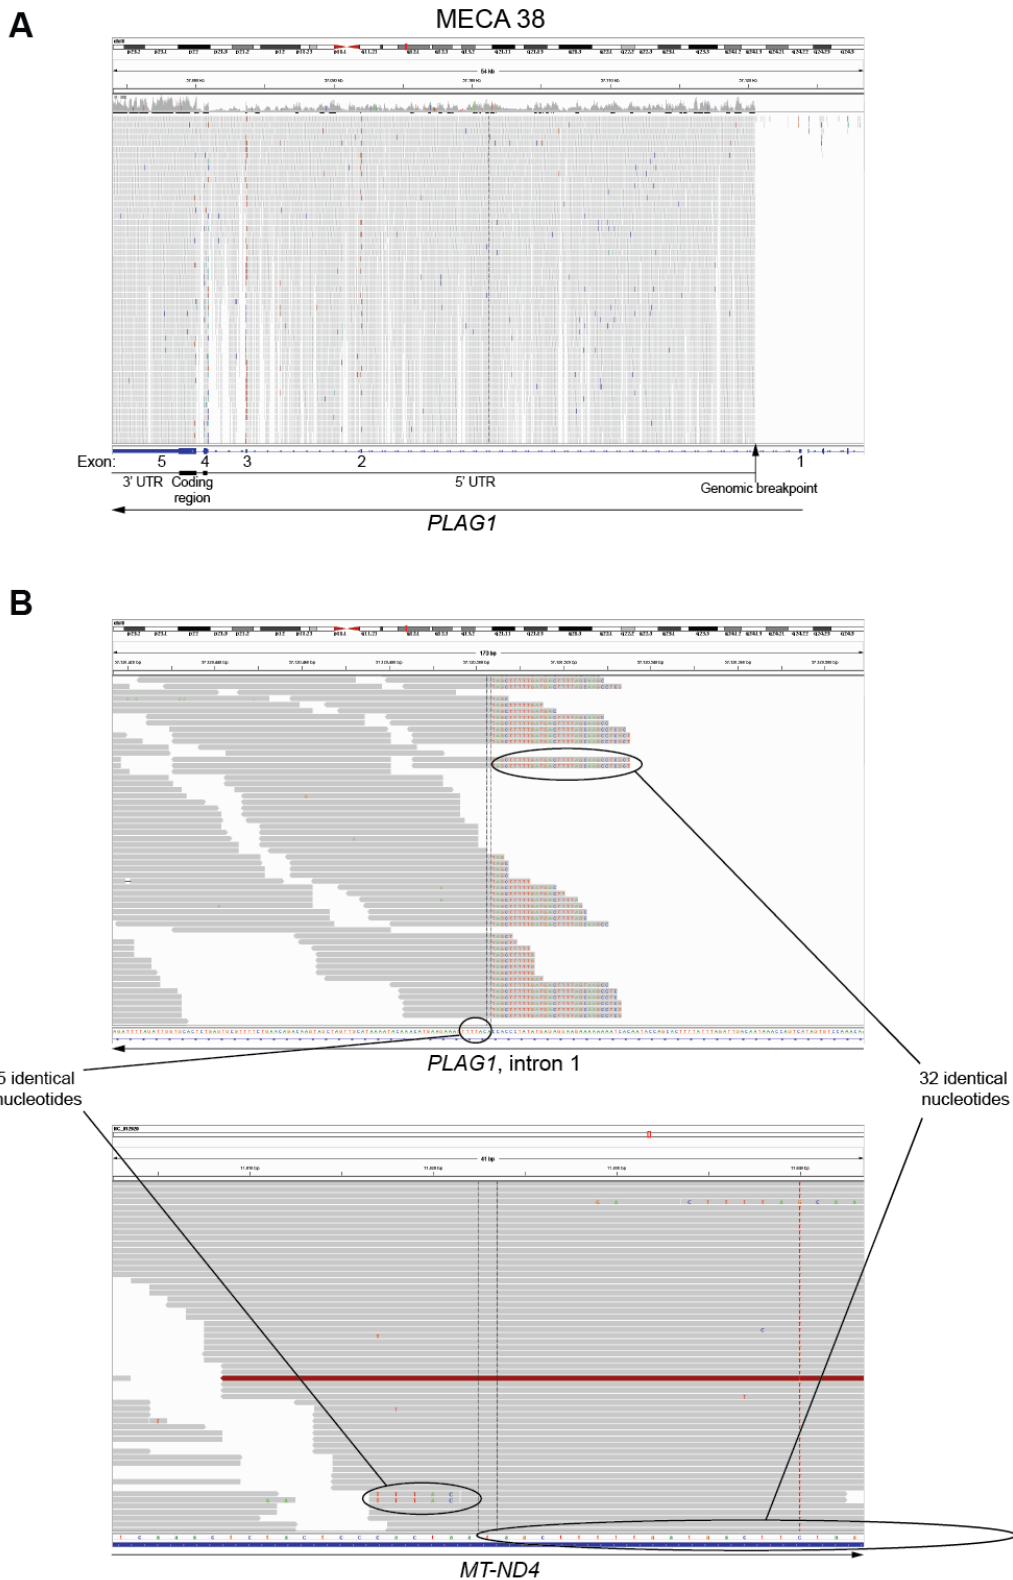

**Supplementary Figure 23.** Detection of the mitochondrial/nuclear DNA fusion gene *ND4-PLAG1* using RNA sequencing. (A) IGV screenshot showing the genomic breakpoint in intron 1 of *PLAG1*, leading to the formation of a large 5' UTR. (B) Genomic breakpoints in *PLAG1* (top) and *MT-ND4* (bottom), with overlapping nucleotides circled.

**A****MECA38****gDNA :**

Primers3F+1R

NNNNNCTNNNNN**CTA**TGTA**AAAC**TTTCTTTCATGTTTGTATTTTATGCAACTAGCTACTTGTCTGTT**CAGAAA**CGCACTCAGAGTGCACCAATCTAA**AACT**CGTAATCGCTTAGAGAGTCTTATTTAGATGGGGC**CACAGCACA**ATATTTAATTTGAAGT**GATT**GTACTGAGCTTTTGTGATGCCTTAGAA**ATACTAC**CTGTTGAACATCCTTTTCTGAAGCTATTAATTA**TACCAGTATA**CAGAAATAATGT**CATGAT**ATTGTGTAGTCAAA**ATCTTT**ATTT**CAGTTGGAAT**CNGANA**AACTCAA**AAANNANGAGANNAGNNNTTNNNGGGCANCAGGNTTNNANGTNN**TTAAGGT**NANGGGT**GATNA**ACCCCTTGGGGNTGTGCNNANNNGNNNNGNNANTTANGGGCTGGANNAATNTTNNNNTCANCNNGAAAG**NACT**TNNGNGTGNATCCNGGGNANTNAACGTATGGTA**ACTTT**CANA**ACTG**ANTAANCCGNAGATNAT**TN**ANNGGANNNGTTTGGT**CATG**TATT**TNGA**AGAACACNAANAGGGAA**NA**AAAAAGTATANCCGGCGAGTACTATCTGAGAGTNGTANNTCTCAAGAGNNNNANATCTATNTTGT**C**NNNCTCATANNANNNNNNCAGGGNNGT**T**NGNNNCNNTNNNNNNCNGNNAACNCGGN

**cDNA**

Primers4F+1R

NNNNNNNNNNNNNNNGGGTTAGGGTGGTTATAGTAGTGTGCATGGTTAT**TACT**TTTTATTTGGAGTTGCACCAAAAT**TCT**TGGGGCCTAAGACCAATGGATAGCTGTTATCCTTTAAAGTTGAGAAAGCCATGTTGTTAGACATGGGGGCATGAGTTAGCAGTCTTGTGAGCTTTCTCGGTAATAAGGGT**CGTA**AGCCTCTGTGT**CAGAT**TCACAATCTGATGTTTGGTTAAACTATATTTAC**AAGAGGAAA**ACCGGTAATGATGTCGGGGTTGAGGGATAGGAGGAAATGGGGGATAGGTGTATGAACATGAGGGT**GTTTT**CTCGTGTGAATGAGGGTTTTATGTTGTTAATGTGGTGGGTGAGTGAGCCCCATTGTGTTGGTAAATATGTAGAGGGAGTATAGGGCTGTGACTAGTATGTTGAGTCTGTAAGTAGGAGAGTGATATTTGATCAGGAGAACGTGGTTACTAGC**CAGAGAG**TTCTCCAGTAGGTTAATAGTGGGGGGTAAGCGGAGTTAGCGAGGCTTGCTA**AAAGTCAT**CAAAAGCTA**TGTA**AAACTTTCTTCATGTTTGTATTTATGCAACTAGCTACTTGTCTGTT**CAGAAA**ACGCACAGAGTGCACCAATCTAA**AACT**CTGTAATCGCTTAGAGAGTCTTATTTAGATGGGGC**CACAGCACA**ATATTTAATTTGAAGTATTGTACTGAGCTTTTGTGATGCCTTANA**AACTAC**TACCTGTTGAACATCCTTTTCTGAAGTACCAGTATA**CAGAA**TATGT**CATGAT**ATTGTGTAGTCAAA**TCT**TNATTCANNNNNNNGGGNNNNNNNNNNNTNNNNNNNNNNNAAANNNNNN

Primers4F+3R

NNNNNNNNNNNNNNNGGGTTAGGGTGGTTATAGTAGTGTGCATGGTTAT**TACT**TTTTATTTGGAGTTGCACCAAAATCTTGGGGCCTAAGACCAATGGATAGCTGTTATCCTTTAAAGTTGAGAAAGCCATGTTGTTAGACATGGGGGCATGAGTTAGCAGTCTTGTGAGCTTTCTCGGTAATAAGGGT**CGTA**AGCCTCTGTGT**CAGAT**TCACAATCTGATGTTTTGGTTAAACTATATTTAC**AAGAGGAAA**ACCGGTAATGATGTCGGGGTTGAGGGATAGGAGGAAATGGGGGATAGGTGTATGAACATGAGGGT**GTTTT**CTCGTGTGAATGAGGGTTTTATGTTGTTAATGTGGTGGGTGAGTGAGCCCCATTGTGTTGGTAAATATGTAGAGGGAGTATAGGGCTGTGACTAGTATGTTGAGTCTGTAAGTAGGAGAGTGATATTTGATCAGGAGAACGTGGTTACTAGC**CAGAGAG**TTCTCCAGTAGGTTAATAGTGGGGGGTAAGCGGAGTTAGCGAGGCTTGCTA**AAAGTCAT**CAAAAGCTA**TGTA**AAACTTTCTTCATGTTTGTATTTATGCAACTAGCTACTTGNNNNNNNAAAAAANNNAANNNNNNNNNNNTTNNNTAANNGNNTC**NN**TANNNTCGTANNNNNAANNNNNTNNCACCNNNNNNNNNNTNN

**B**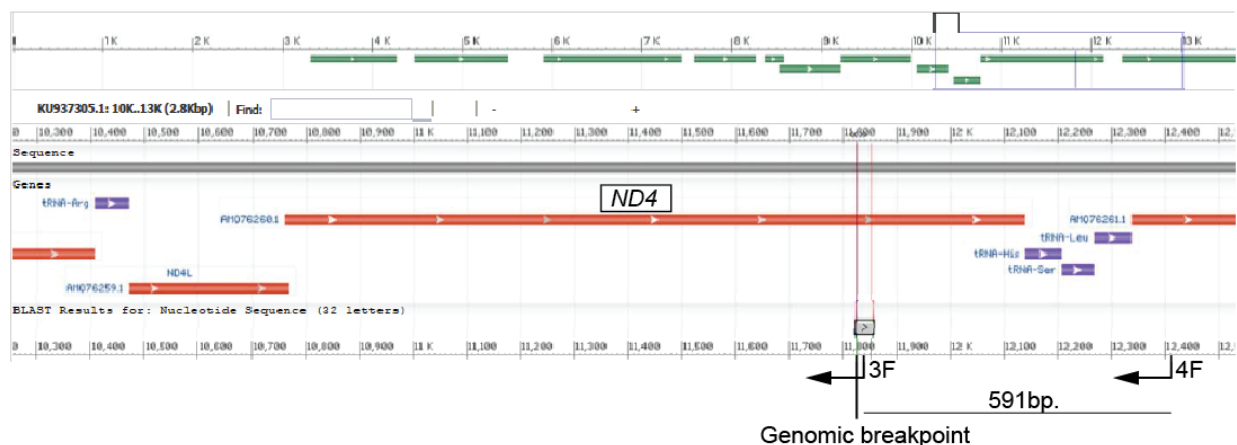

**Supplementary Figure 24.** Confirmation of *ND4-PLAG1* using Sanger sequencing.

(A) Sequences of DNA extracted from PCR products of the denoted primer pairs. Nucleotides that match the *ND4* and *PLAG1* sequences are marked in yellow and blue, respectively. (B) Overview of the *ND4* locus and surrounding genes, and locations of primers 3F and 4F.

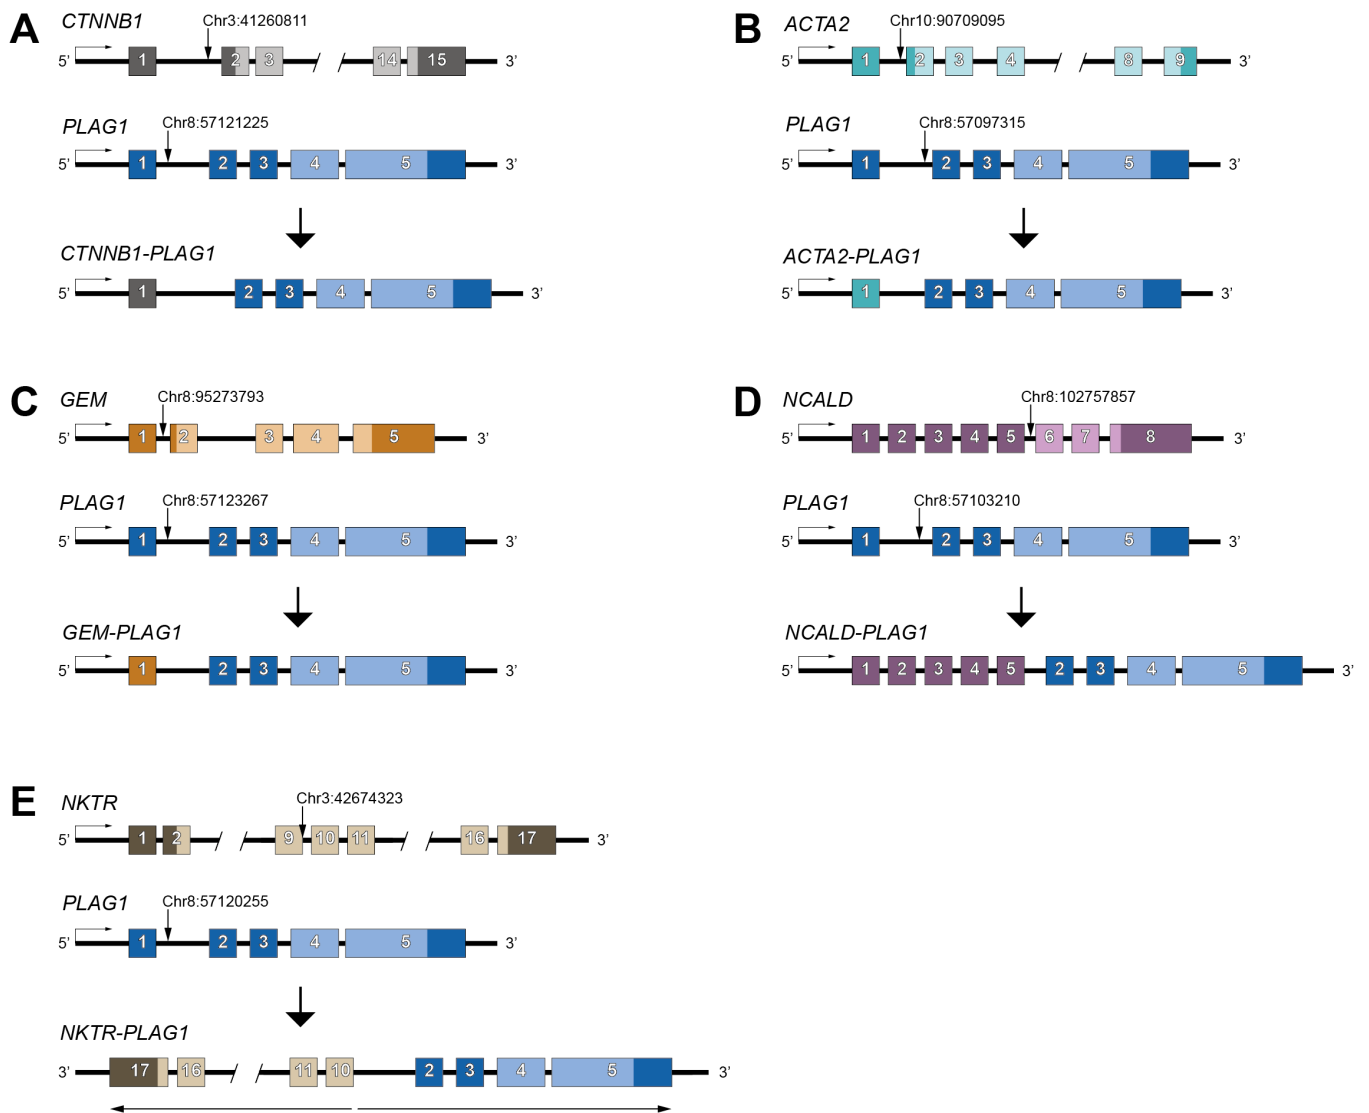

**Supplementary Figure 25.** Other *PLAG1* fusion genes. Illustrations of the *CTNNB1-PLAG1* (A), *GEM-PLAG1* (B), *ACTA2-PLAG1* (C) and *NCALD-PLAG1* (D) fusion genes, detected in one case each. (E) Illustration of the *NKTR-PLAG1* fusion gene detected in one case, where the inverted intron 9 of *NKTR* is fused with intron 1 of *PLAG1*. Arrows show locations of the genomic breakpoints.

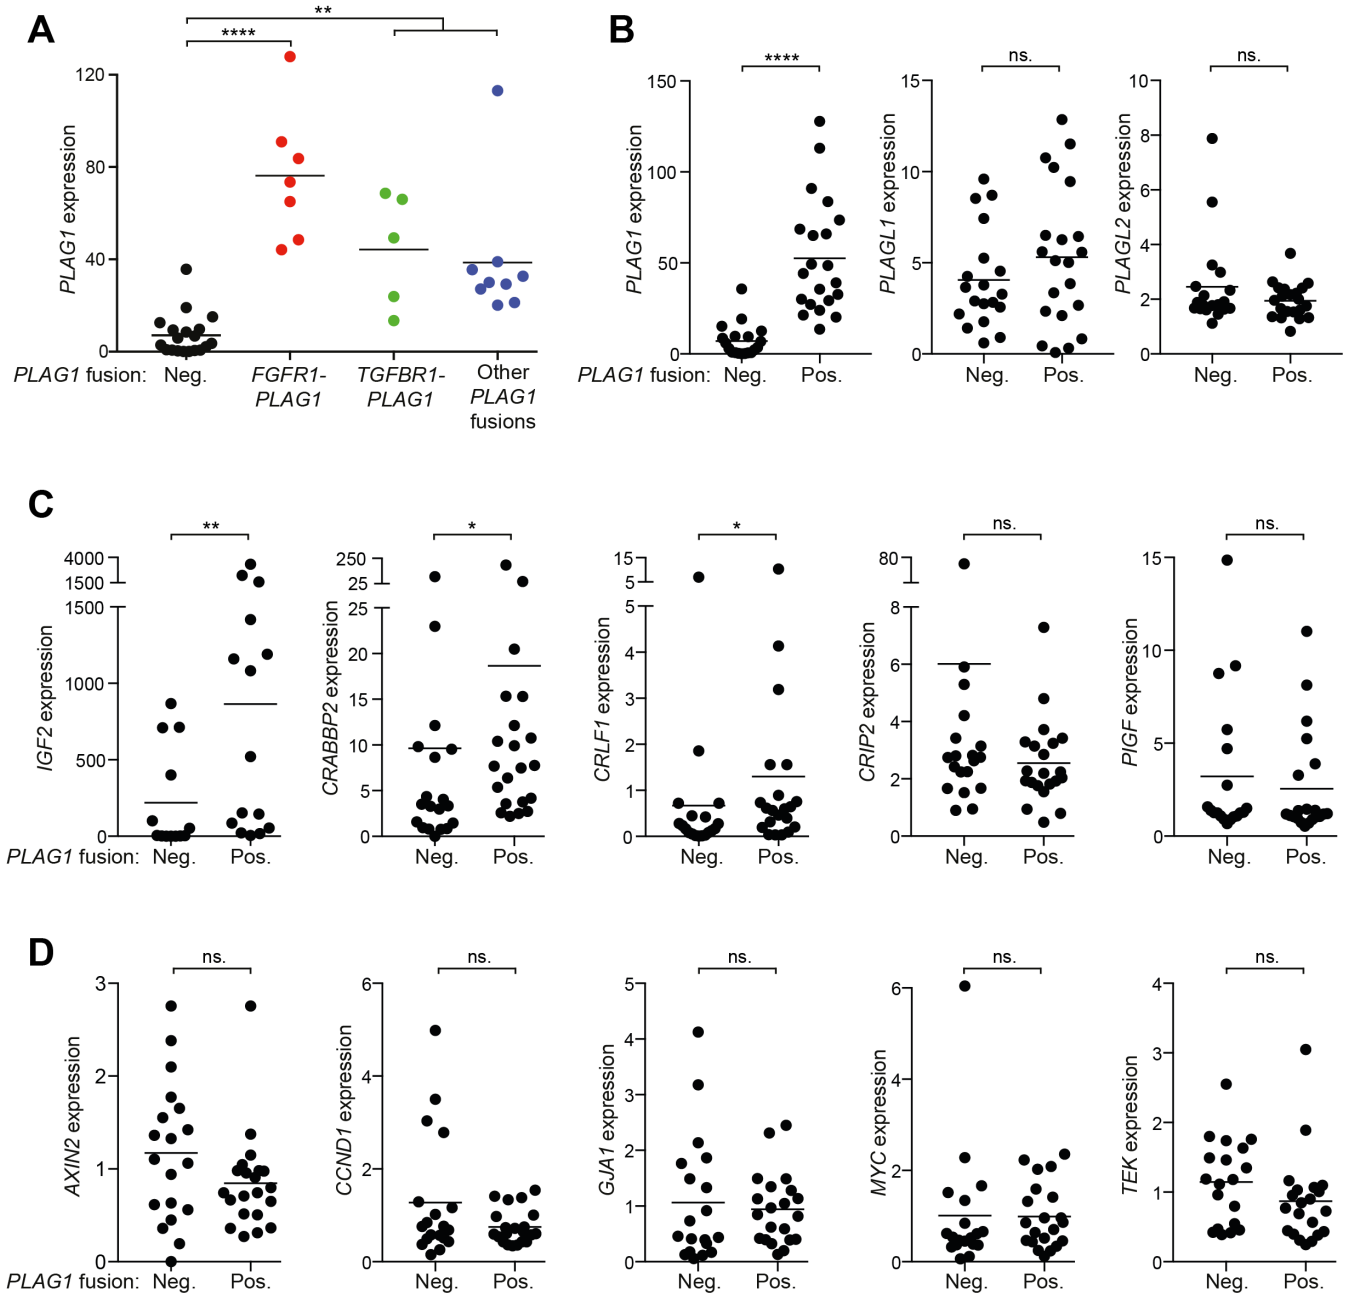

**Supplementary Figure 26.** Effects of *PLAG1* rearrangements on gene expression. (A) *PLAG1* expression (FPKM) in tumors grouped by *PLAG1* fusion status. \*\* $P < 0.01$ , \*\*\*\* $P < 0.0001$ ; 1-way ANOVA with Dunnett's multiple comparison test. (B-D) Expression of (B) *PLAG1* family members, (C) putative *PLAG1* effector genes, and (D) Wnt signaling effector genes, in *PLAG1* fusion negative- and positive cases. \* $P < 0.05$ , \*\* $P < 0.01$ , \*\*\*\* $P < 0.0001$ ; Mann-Whitney test. Horizontal lines represent mean values.



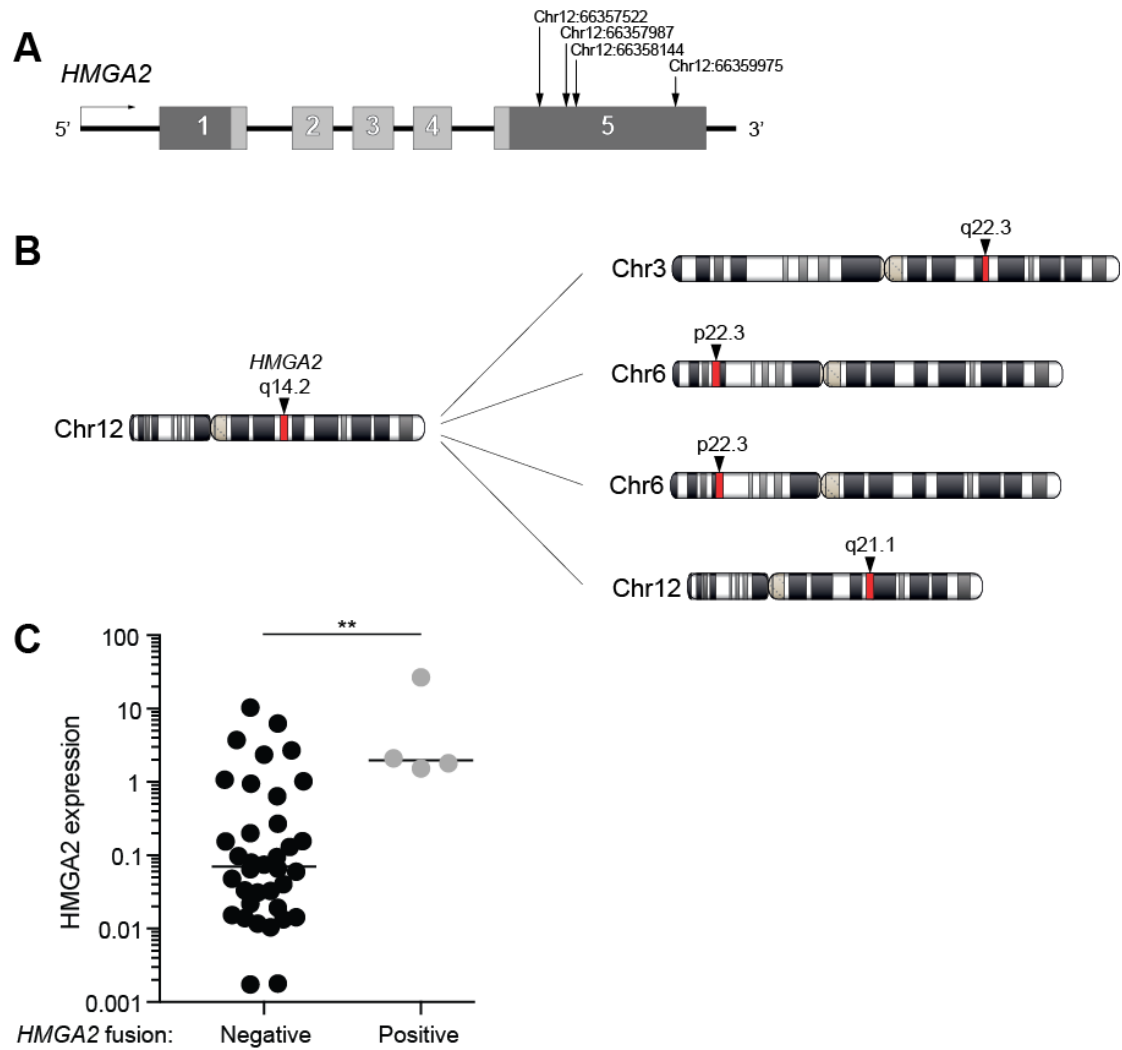

**Supplementary Figure 27. *HMGA2* rearrangements.** (A) Illustration of *HMGA2* with arrows denoting breakpoint positions in the 4 tumors with *HMGA2* rearrangements. (B) Genomic position of the *HMGA2* gene (left) and of the loci fused with *HMGA2* in the 4 rearrangement-positive tumors (right). (C) *HMGA2* expression (FPKM) based on RNA sequencing in tumors negative or positive for *HMGA2* rearrangements. **\*\*** $P < 0.01$ ; Student's t test.  $n = 36 + 4$ . Horizontal lines represent mean values.

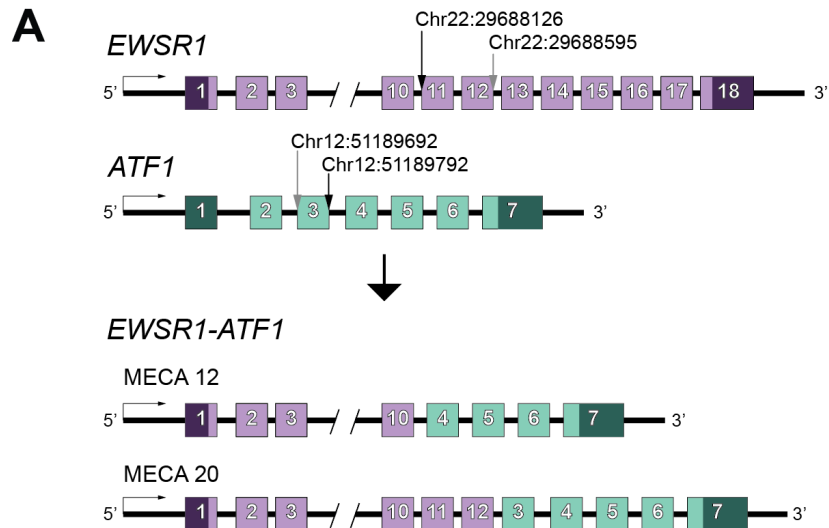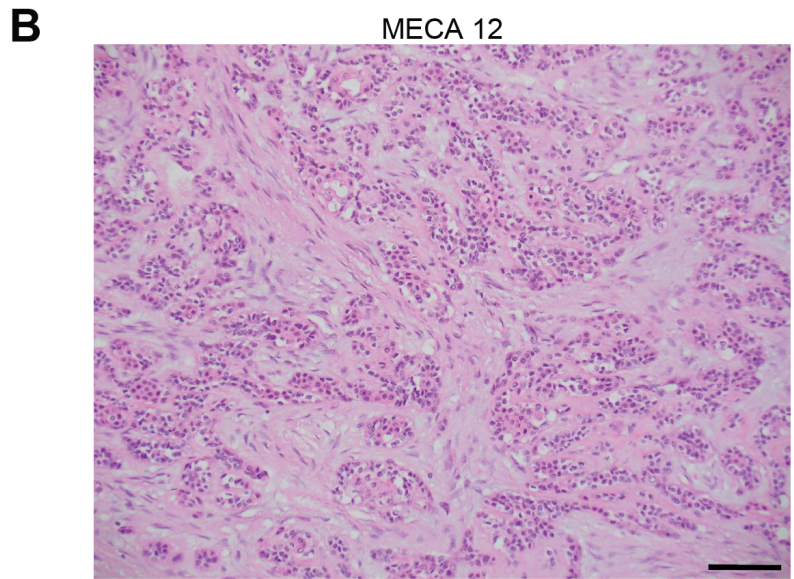

**Supplementary Figure 28.** The *EWSR1-ATF1* fusion gene. (A) Illustration showing localization of the breakpoints in the two cases of *EWSR1-ATF1*. (B) Example of clear cell features in a MECA with an *EWSR1-ATF1* fusion (H/E staining). Scale bar, 100  $\mu\text{m}$ .

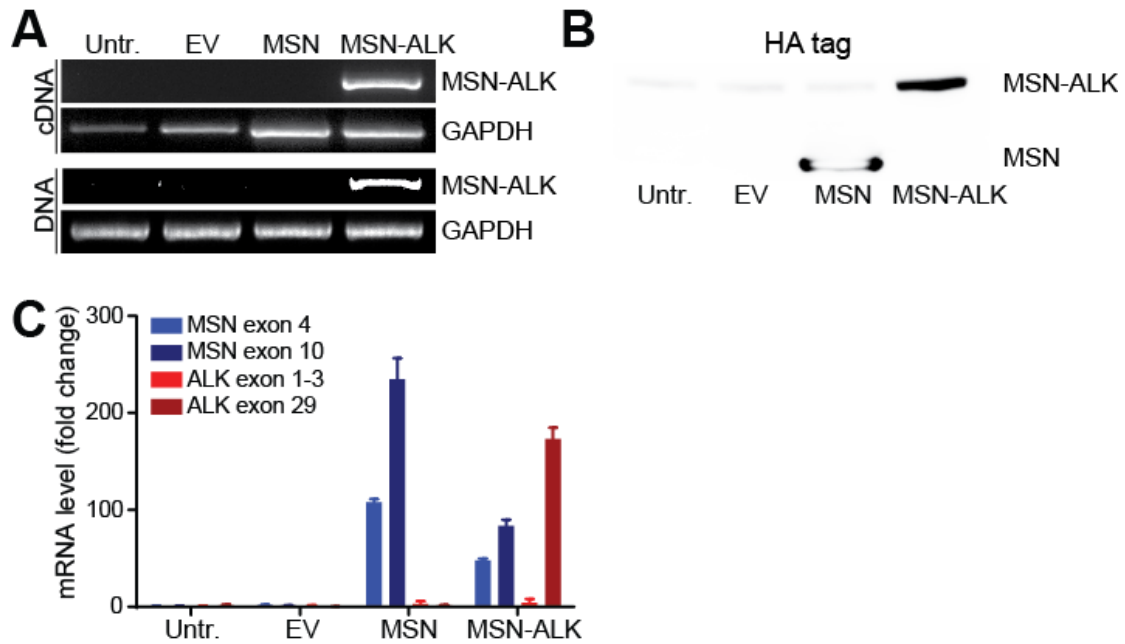

**Supplementary Figure 29.** Confirmation of MSN and MSN-ALK expression in infected HSG cells. (A) PCR (top) and reverse transcriptase (RT)-PCR (bottom) analyses showing presence and expression of the fusion in HSG cells infected with lentivirus expressing *MSN-ALK*. Untr, untreated. (B) Western blot showing detection of the HA-tag in cells expressing *MSN* and *MSN-ALK*. EV, empty vector. (C) Quantitative RT-PCR showing *MSN* and *ALK* RNA expression upstream (*MSN* exon 4 and *ALK* exon 1-3) and downstream (*MSN* exon 10 and *ALK* exon 29) of the *MSN-ALK* breakpoint. Data are mean  $\pm$  SEM using 3 technical replicates per group.

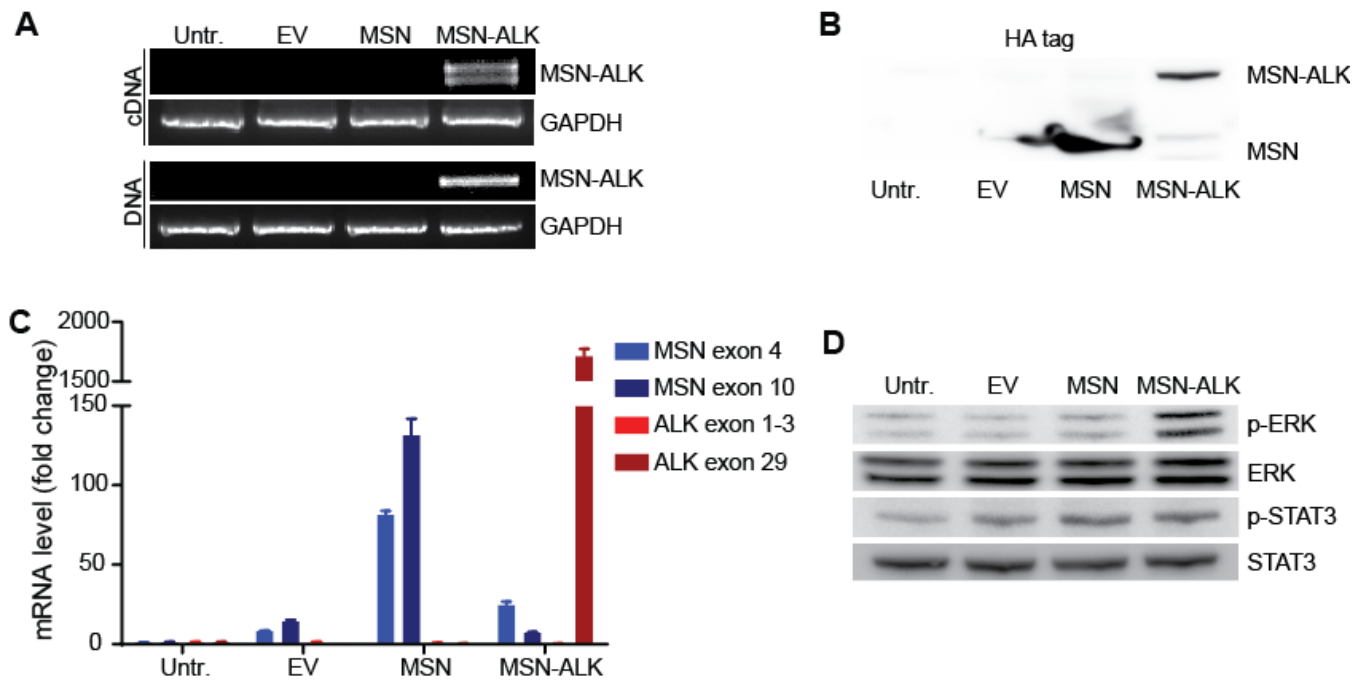

**Supplementary Figure 30.** *MSN-ALK* expression causes hyperactivation of downstream signaling pathways in HEK cells. (A) PCR (top) and reverse transcriptase (RT)-PCR (bottom) analyses showing presence and expression of the fusion in HEK cells infected with lentivirus expressing *MSN-ALK*. Untr, untreated. (B) Western blot showing detection of the HA-tag in cells expressing *MSN* and *MSN-ALK*. EV, empty vector. (C) Quantitative RT-PCR showing *MSN* and *ALK* RNA expression upstream (*MSN* exon 4 and *ALK* exon 1-3) and downstream (*MSN* exon 10 and *ALK* exon 29) of the *MSN-ALK* breakpoint. Data are mean  $\pm$  SEM using 3 technical replicates per group. (D) Western blot showing levels of *ALK* downstream signaling proteins in HEK cells expressing empty vector (*EV*), *MSN*, or *MSN-ALK*. P, phosphorylated.

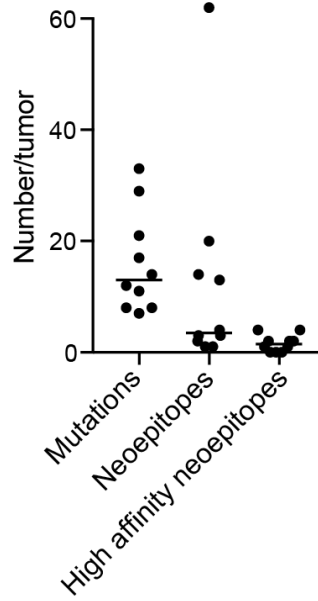

**Supplementary Figure 31.** Number of mutations and predicted neoepitopes in cohort 1 tumors. Neoepitopes and high affinity neoepitopes are defined as having a predicted binding affinity to MHC molecules of <500nM and <50nM, respectively. Horizontal lines represent median numbers. MECA08 was excluded from the graph, and had 1111 mutations, 1961 neoepitopes, and 163 high affinity neoepitopes.

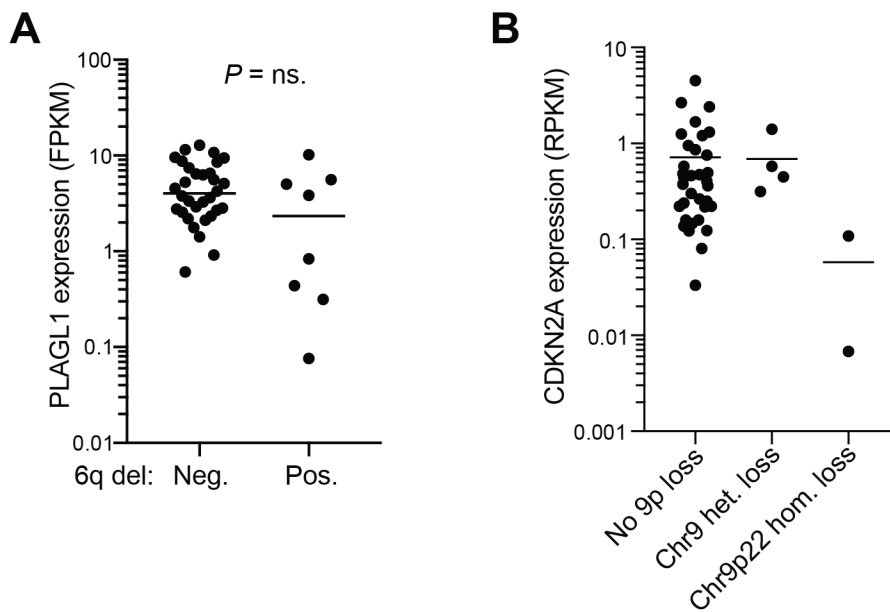

**Supplementary Figure 32.** Expression of selected genes in tumors with deletions. (A) PLAGL1 expression in 6q deletion positive and negative tumors. ( $P = 0.15$ , Mann Whitney test). (B) CDKN2A expression in cases without chromosome 9p deletions, with heterozygous deletion of the entire chromosome 9, and with localized homozygous deletion of 9p22. Horizontal lines show mean values.

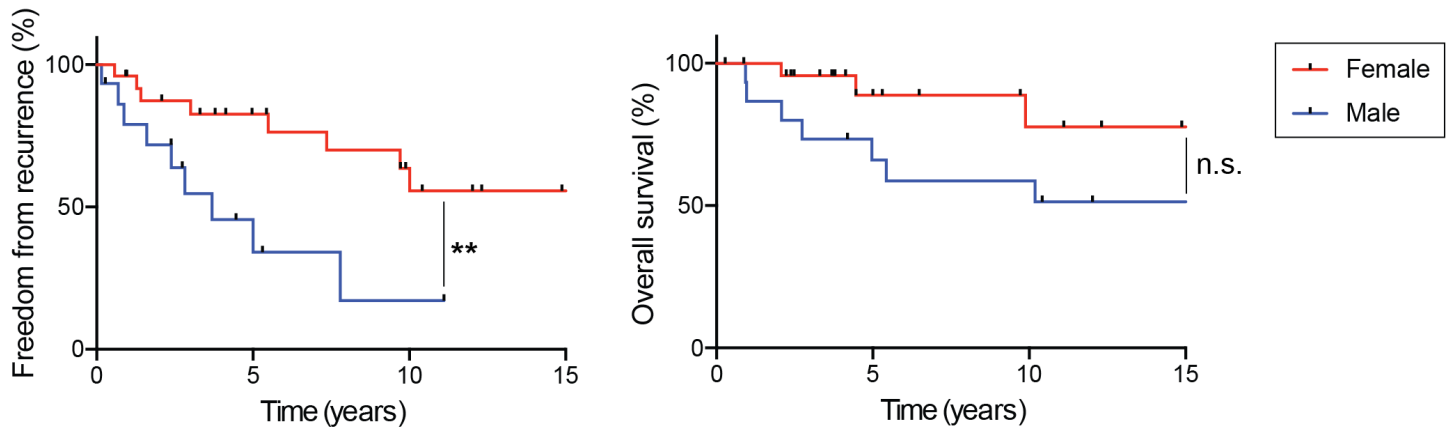

**Supplementary Figure 33.** Correlation between sex and prognosis. Freedom from recurrence and overall survival in females ( $n = 25$ ) and males ( $n = 15$ ) with MECA.  $**P < 0.01$ ; Log rank test.

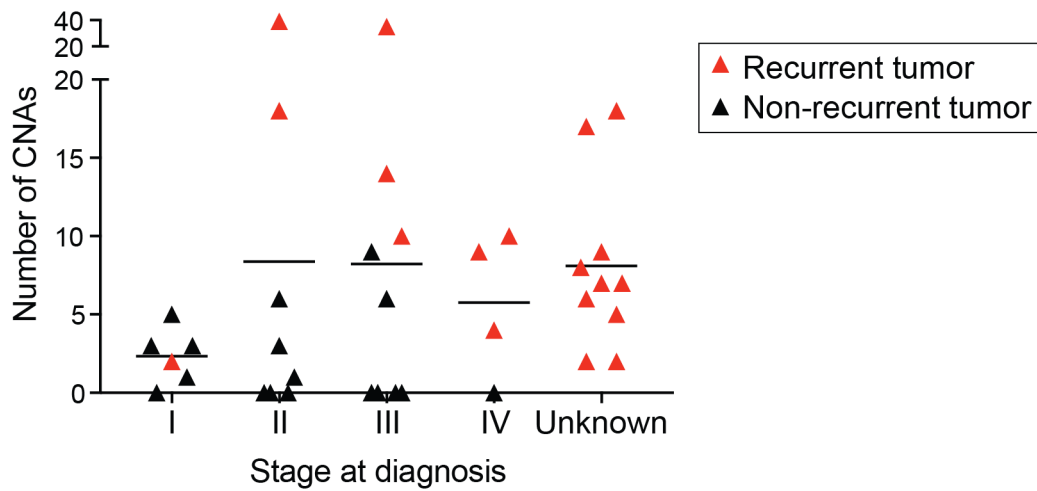

**Supplementary Figure 34.** Number of CNAs and risk of recurrence in different tumor stages. Stage I, localized disease, tumor  $\leq 2$  cm without extraparenchymal extension; stage II, localized disease, tumor 2-4 cm without extraparenchymal extension; stage III, localized disease, tumor  $>4$  cm and/or extraparenchymal extension; stage IV, locally advanced disease (tumor invades the skin, mandible, ear canal, and/or facial nerve) or metastasis to lymph nodes/distant organs.



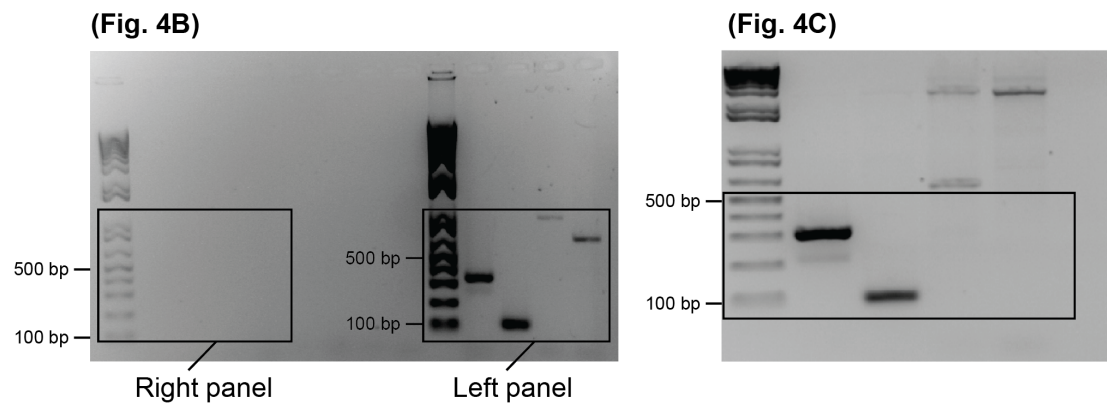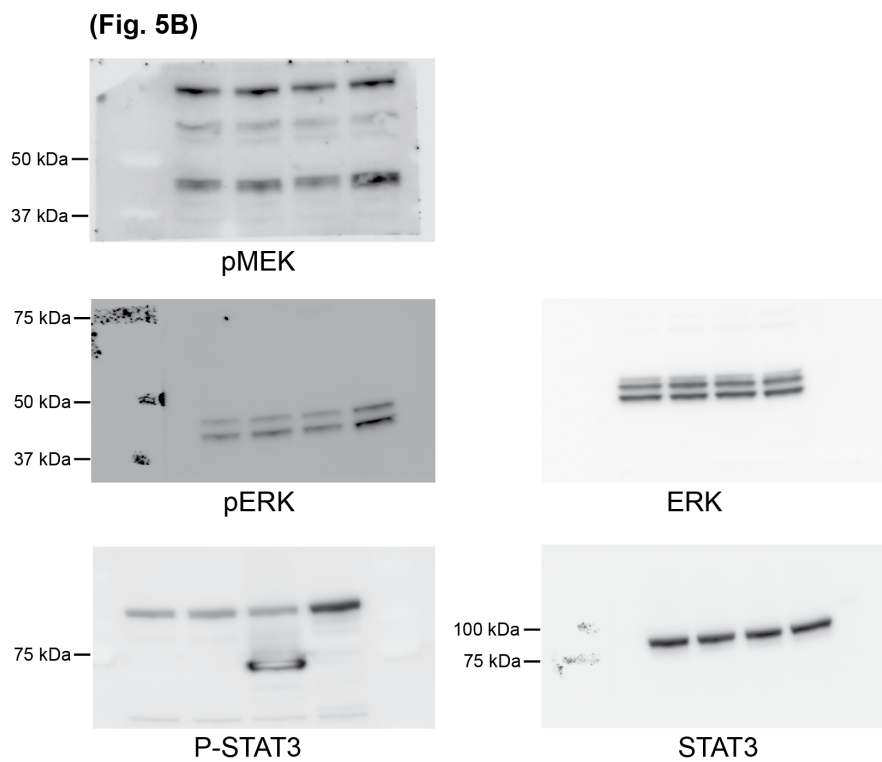

**Supplementary Figure 35.** Full pictures of PCR gels and western blots that were cropped for inclusion in main figures.

**Supplementary Table 1.** Clinical information of 40 patients with MECA.

|                                   | <b>n (%) or mean (range)</b> |
|-----------------------------------|------------------------------|
| <b>Male sex</b>                   | 15 (38%)                     |
| <b>Age at diagnosis (y)</b>       | 54 (13-90)                   |
| <b>Smoking history</b>            |                              |
| Yes                               | 18 (45%)                     |
| No                                | 21 (53%)                     |
| Unknown                           | 1 (3%)                       |
| <b>Primary tumor site</b>         |                              |
| Parotid                           | 33 (83%)                     |
| Submandibular                     | 2 (5%)                       |
| Minor glands                      | 5 (13%)                      |
| <b>Tumor origin</b>               |                              |
| De novo                           | 18 (45%)                     |
| Ex-pleomorphic adenoma            | 22 (55%)                     |
| <b>Disease stage at diagnosis</b> |                              |
| Localized                         | 24 (60%)                     |
| Lymph node metastasis             | 3 (8%)                       |
| Distant metastasis                | 2 (5%)                       |
| Unknown                           | 11 (28%)                     |
| <b>Initial treatment</b>          |                              |
| Surgery                           | 24 (60%)                     |
| Surgery and radiotherapy          | 16 (40%)                     |
| <b>Disease recurrence</b>         |                              |
| No                                | 21 (53%)                     |
| Local                             | 10 (25%)                     |
| Distant                           | 3 (8%)                       |
| Local and distant                 | 6 (15%)                      |
| <b>Status at latest follow-up</b> |                              |
| Alive without disease             | 25 (63%)                     |
| Alive with disease                | 2 (5%)                       |
| Death from disease                | 9 (23%)                      |
| Death from other causes           | 4 (10%)                      |

**Supplementary Table 2.** Fusion genes in MECA.

| Case     | Origin  | Fusion gene              | 5' breakpoint* | 3' breakpoint  | Detection methods     |
|----------|---------|--------------------------|----------------|----------------|-----------------------|
| MECA 01  | Ex-PA   | -                        | -              | -              | -                     |
| MECA 02  | Ex-PA   | <i>FGFR1-PLAG1</i>       | Chr8:38311736  | Chr8:57100178  | RNA seq, RT-PCR, FISH |
| MECA 03  | de novo | <i>TGFBR3-PLAG1</i>      | Chr1:92351435  | Chr8:57083748  | RNA seq, RT-PCR, FISH |
| MECA 04  | de novo | <i>NKTR-PLAG1</i>        | Chr3:42674323  | Chr8:57120255  | RNA seq, FISH         |
| MECA 05  | Ex-PA   | <i>FGFR1-PLAG1</i>       | Chr8:38317963  | Chr8:57088068  | RNA seq, RT-PCR, FISH |
| MECA 06  | Ex-PA   | -                        | -              | -              | -                     |
| MECA 07  | Ex-PA   | <i>TGFBR3-PLAG1</i>      | Chr1:92327028  | Chr8:57083748  | RNA seq, RT-PCR, FISH |
| MECA 08  | de novo | -                        | -              | -              | -                     |
| MECA 09  | de novo | <i>TGFBR3-PLAG1</i>      | Chr1:92269447  | Chr8:57118596  | RNA seq, RT-PCR, FISH |
| MECA 10  | de novo | <i>MSN-ALK</i>           | ChrX:64956787  | Chr2:29446394  | RNA seq, RT-PCR, FISH |
| MECA 11  | Ex-PA   | -                        | -              | -              | -                     |
| MECA 12  | de novo | <i>EWSR1-ATF1</i>        | Chr22:29688595 | Chr12:51189692 |                       |
| MECA 13  | Ex-PA   | <i>FGFR1-PLAG1</i>       | Chr8:38323128  | Chr8:57104299  | RNA seq, FISH         |
| MECA 14  | de novo | <i>TGFBR3-PLAG1</i>      | Chr1:92327028  | Chr8:57083748  |                       |
| MECA 15  | de novo | -                        | -              | -              | -                     |
| MECA 16  | Ex-PA   | -                        | -              | -              | -                     |
| MECA 17  | de novo | -                        | -              | -              | -                     |
| MECA 18  | de novo | <i>TGFBR3-PLAG1</i>      | Chr1:92326040  | Chr8:57097807  | RNA seq, FISH         |
| MECA 19  | de novo | <i>HMGA2</i> -Intergenic | Chr12:66358144 | Chr6:19395923  | RNA seq               |
| MECA 20  | de novo | <i>EWSR1-ATF1</i>        | Chr12:51189792 | Chr22:29688126 | RNA seq               |
| MECA 21  | Ex-PA   | <i>GEM-PLAG1</i>         | Chr8:95273793  | Chr8:57123267  | RNA seq               |
| MECA 22  | Ex-PA   | -                        | -              | -              | -                     |
| MECA 23  | Ex-PA   | <i>FGFR1-PLAG1</i>       | Chr8:38322623  | Chr8:57119328  | RNA seq, FISH         |
| MECA 24  | Ex-PA   | Unknown- <i>PLAG1</i>    | -              | Chr8:57086934  |                       |
| MECA 25  | de novo | -                        | -              | -              | -                     |
| MECA 26  | Ex-PA   | <i>FGFR1-PLAG1</i>       | Chr8:38317982  | Chr8:57102233  | RNA seq, FISH         |
| MECA 27  | de novo | -                        | -              | -              | -                     |
| MECA 28  | Ex-PA   | Unknown- <i>PLAG1</i>    | -              | Chr8:57123798  | RNA seq               |
| MECA 29  | Ex-PA   | <i>FGFR1-PLAG1</i>       | Chr8:38321934  | Chr8:57116115  | RNA seq, FISH         |
| MECA 30* | Ex-PA   | <i>FGFR1-PLAG1</i>       | Chr8:38323534  | Chr8:57121084  | RNA seq, FISH         |
| MECA 31  | Ex-PA   | Intergenic- <i>PLAG1</i> | Chr8:57752529  | Chr8:57123041  | RNA seq               |
| MECA 32  | Ex-PA   | <i>HMGA2</i> -intergenic | Chr12:66359975 | Chr3:139438938 | RNA seq               |
| MECA 33  | Ex-PA   | <i>ACTA2-PLAG1</i>       | Chr10:90709095 | Chr8:57097315  | RNA seq               |
| MECA 34  | Ex-PA   | <i>HMGA2</i> -intergenic | Chr12:66357522 | Chr12:72598179 | RNA seq               |
| MECA 35  | de novo | <i>NCALD-PLAG1</i>       | Chr8:102757857 | Chr8:57103210  | RNA seq               |
| MECA 36  | de novo | -                        | -              | -              | -                     |
| MECA 37  | Ex-PA   | <i>CTNNB1-PLAG1</i>      | Chr3:41260811  | Chr8:57121225  | RNA seq               |
| MECA 38  | Ex-PA   | <i>ND4-PLAG1</i>         | mt:11,823      | Chr8:57120503  | RNA seq, PCR, RT-PCR  |
| MECA 39  | Ex-PA   | <i>HMGA2</i> -intergenic | Chr6:19534907  | Chr12:66357987 | RNA seq               |
| MECA 40  | Ex-PA   | -                        | -              | -              | -                     |

\*This case also harbored a *TGFBR3-PLAG1* fusion in focal areas, detected by FISH only, see Supplementary Fig. 14B.

**Supplementary Table 3.** *FGFR1-PLAG1* fusion status in MECA and other salivary gland tumors.

| Tumor type | n (total) | n ( <i>FGFR1-PLAG1</i> ) | %    | P-value* | Methods                         | Reference                                    |
|------------|-----------|--------------------------|------|----------|---------------------------------|----------------------------------------------|
| MECA       | 40        | 7                        | 17.5 | N/A      | RNA seq, RT-PCR, FISH.          | Current study                                |
| MECA ex-PA | 24        | 7                        | 29.2 | N/A      | RNA seq, RT-PCR, FISH.          | Current study                                |
| PA         | 442       | 12                       | 2.7  | 0.0004   | Karyotyping, array-CGH, RT-PCR. | <sup>2</sup> , Unpubl. (G.S)                 |
| ACC        | 128       | 0                        | 0    | 0.00003  | WGS, RNA seq, karyotyping.      | <sup>2, 3, 4, 5, 6</sup> , Unpubl. (L.G.T.M) |
| MEC        | 44        | 0                        | 0    | 0.004    | Karyotyping.                    | <sup>2</sup>                                 |
| AC NOS     | 20        | 0                        | 0    | 0.08     | Karyotyping.                    | <sup>2</sup>                                 |
| WT         | 20        | 0                        | 0    | 0.08     | Karyotyping.                    | <sup>2</sup>                                 |
| CA ex-PA   | 18        | 0                        | 0    | 0.09     | Karyotyping.                    | <sup>2</sup>                                 |
| SDC        | 16        | 0                        | 0    | 0.17     | RNA seq.                        | <sup>7</sup>                                 |
| PLGA       | 13        | 0                        | 0    | 0.17     | RNA seq, FISH.                  | <sup>2, 8</sup> , Unpubl. (N.K)              |
| AciCC      | 12        | 0                        | 0    | 0.18     | Karyotyping.                    | <sup>2</sup>                                 |
| SCC        | 3         | 0                        | 0    | 1.00     | Karyotyping.                    | <sup>2</sup>                                 |
| BCAC       | 3         | 0                        | 0    | 1.00     | FISH, karyotyping.              | <sup>2</sup> , Unpubl. (N.K)                 |
| EMC        | 2         | 0                        | 0    | 1.00     | FISH.                           | Unpubl. (N.K)                                |
| SB         | 1         | 0                        | 0    | 1.00     | Karyotyping.                    | <sup>2</sup>                                 |
| Met PA     | 1         | 0                        | 0    | 1.00     | Karyotyping.                    | <sup>2</sup>                                 |

\**P*-value testing if the prevalence of *FGFR1-PLAG1* is significantly different between MECA and other tumor types (Fisher's exact test). MECA, myoepithelial carcinoma; PA, pleomorphic adenoma; ACC, adenoid cystic carcinoma; MEC, mucoepidermoid carcinoma; AC NOS, adenocarcinoma not otherwise specified; WT, Warthin's tumor; CA ex-PA, carcinoma ex pleomorphic adenoma; SDC, salivary duct carcinoma; PLGA, polymorphous low-grade adenocarcinoma; AciCC, acinic cell carcinoma; SCC, squamous cell carcinoma; BCAC, basal cell adeno-carcinoma; EMC, Epithelial-myoepithelial carcinoma; SB, sialoblastoma; Met, metastasizing; WGS, whole genome sequencing.

**Supplementary Table 4.** *TGFBR3-PLAG1* fusion status in MECA and other salivary gland tumors.

| <b>Tumor type</b> | <b>n (total)</b> | <b>n (<i>TGFBR3-PLAG1</i>)</b> | <b>%</b> | <b>P-value<sup>1</sup></b> | <b>Methods</b>                  | <b>References</b>                            |
|-------------------|------------------|--------------------------------|----------|----------------------------|---------------------------------|----------------------------------------------|
| MECA              | 40               | 6                              | 15       | N/A                        | RNA seq, RT-PCR, FISH.          | Current study                                |
| PA                | 442              | 0 <sup>2</sup>                 | 0        | <0.0001                    | Karyotyping, array-CGH, RT-PCR. | <sup>2</sup> , Unpubl. (G.S)                 |
| ACC               | 128              | 0                              | 0        | 0.0001                     | WGS, RNA seq, karyotyping.      | <sup>2, 3, 4, 5, 6</sup> , Unpubl. (L.G.T.M) |
| MEC               | 44               | 0                              | 0        | 0.009                      | Karyotyping.                    | <sup>2</sup>                                 |
| AC NOS            | 20               | 0                              | 0        | 0.17                       | Karyotyping.                    | <sup>2</sup>                                 |
| WT                | 20               | 0                              | 0        | 0.17                       | Karyotyping.                    | <sup>2</sup>                                 |
| CA ex-PA          | 18               | 0                              | 0        | 0.17                       | Karyotyping.                    | <sup>2</sup>                                 |
| SDC               | 16               | 0                              | 0        | 0.17                       | RNA seq.                        | <sup>7</sup>                                 |
| PLGA              | 13               | 0                              | 0        | 0.32                       | RNA seq, FISH.                  | <sup>2, 8</sup> , Unpubl. (N.K)              |
| AciCC             | 12               | 0                              | 0        | 0.32                       | Karyotyping.                    | <sup>2</sup>                                 |
| SCC               | 3                | 0                              | 0        | 1.00                       | Karyotyping.                    | <sup>2</sup>                                 |
| BCAC              | 3                | 0                              | 0        | 1.00                       | FISH, karyotyping.              | <sup>2</sup> , Unpubl. (N.K)                 |
| EMC               | 2                | 0                              | 0        | 1.00                       | FISH.                           | Unpubl. (N.K)                                |
| SB                | 1                | 0                              | 0        | 1.00                       | Karyotyping.                    | <sup>2</sup>                                 |
| Met PA            | 1                | 0                              | 0        | 1.00                       | Karyotyping.                    | <sup>2</sup>                                 |

<sup>1</sup>P-value testing if the prevalence of *TGFBR3-PLAG1* is significantly different between MECA and other tumor types (Fisher's exact test). <sup>2</sup>In 1 of the 442 PAs, karyotyping showed a t(1;8) translocation; this tumor was negative for *TGFBR3-PLAG1* using RT-PCR. MECA, myoepithelial carcinoma; PA, pleomorphic adenoma; ACC, adenoid cystic carcinoma; MEC, mucoepidermoid carcinoma; AC NOS, adenocarcinoma, not otherwise specified; WT, Warthin tumor; CA ex-PA, carcinoma ex-pleomorphic adenoma; SDC, salivary duct carcinoma; PLGA, polymorphous low-grade adenocarcinoma; AciCC, acinic cell carcinoma; SCC, squamous cell carcinoma; BCAC, basal cell adenocarcinoma; EMC, epithelial-myoeplithelial carcinoma; SB, sialoblastoma; Met, metastasizing; WGS, whole genome sequencing.

**Supplementary Table 5.** Predicted HLA-binding neoantigen formation for fusion genes in cohort 1.

| Case       | Fusion gene         | 5' breakpoint | 3' breakpoint | Neo-epitope sequence <sup>1</sup> | Neo-epitope affinity (nM) <sup>2</sup> | HLA allele |
|------------|---------------------|---------------|---------------|-----------------------------------|----------------------------------------|------------|
| MECA 02    | <i>FGFR1-PLAG1</i>  | 8:38311736    | 8:57100178    | -                                 | N/A                                    | N/A        |
| MECA 03    | <i>TGFBR3-PLAG1</i> | 1:92351435    | 8:57083748    | -                                 | N/A                                    | N/A        |
|            |                     | 1:92327027    |               | SSCLATADWPK                       | 68                                     | HLA-A11:01 |
| MECA 04    | <i>NKTR-PLAG1</i>   | 3:42674323    | 8:57120255    | -                                 | N/A                                    | N/A        |
| MECA 05    | <i>FGFR1-PLAG1</i>  | 8:38317963    | 8:57088068    | -                                 | N/A                                    | N/A        |
| MECA 07    | <i>TGFBR3-PLAG1</i> | 1:92327028    | 8:57083748    | CLATADWPK                         | 88                                     | HLA-A68:01 |
|            |                     |               |               | CLATADWPK                         | 411                                    | HLA-A02:16 |
|            |                     |               |               | LMSSCLATAD                        | 98                                     | HLA-A02:02 |
|            |                     |               |               | LMSSCLATAD                        | 118                                    | HLA-A02:03 |
|            |                     |               |               | SSCLATADW                         | 31                                     | HLA-B15:17 |
|            |                     |               |               | 8:57092072                        | ATAGCLLVL                              | 65         |
|            |                     |               | ATAGCLLVL     |                                   | 67                                     | HLA-B15:17 |
|            |                     |               | CLATAGCLL     |                                   | 19                                     | HLA-A02:02 |
|            |                     |               | CLATAGCLL     |                                   | 92                                     | HLA-A02:16 |
|            |                     |               | CLATAGCLL     |                                   | 107                                    | HLA-A02:12 |
|            |                     |               | CLATAGCLLV    |                                   | 28                                     | HLA-A02:03 |
|            |                     |               | CLATAGCLLV    | 155                               | HLA-A02:01                             |            |
| MECA 09    | <i>TGFBR3-PLAG1</i> | 1:92269447    | 8:57118596    | -                                 | N/A                                    | N/A        |
|            |                     | 1:92327027    | 8:57083748    | LATADWPKW                         | 5                                      | HLA-B58:01 |
|            |                     |               |               | LATADWPKW                         | 25                                     | HLA-B53:01 |
|            |                     |               |               | LATADWPKW                         | 74                                     | HLA-B57:03 |
|            |                     | 8:57092072    | MSSCLATADW    | 18                                | HLA-B57:01                             |            |
|            |                     |               | MSSCLATAG     | 421                               | HLA-B35:01                             |            |
|            |                     |               | TAGCLLVLPW    | 254                               | HLA-B58:01                             |            |
| TAGCLLVLPW | 259                 |               | HLA-B57:01    |                                   |                                        |            |
| MECA 10    | <i>MSN-ALK</i>      | x:64956787    | 2:29446394    | KAQQVYRRK                         | 135                                    | HLA-A30:01 |
|            |                     |               |               | QTKKAQQVY                         | 405                                    | HLA-A30:02 |
|            |                     |               |               | QVYRRKHQEL                        | 170                                    | HLA-B08:01 |
| MECA 12    | <i>EWSRI-ATF1</i>   | 22:29688595   | 12:51189692   | -                                 | N/A                                    | N/A        |
|            | <i>ATF1-EWSRI</i>   | 12:51189692   | 22:29688595   | ISHIAQQMNK                        | 94                                     | HLA-A03:01 |

<sup>1</sup>An 8-11 amino acid sequence is shown, depending on coding frame; the fusion junction is in the middle of the sequence. <sup>2</sup>Neoantigens with epitope affinity <50nM are considered strong binders.



**Supplementary Table 6.** Significant CNAs in MECA de novo and MECA ex-PA tumors.

| <b>Chromosome region</b> | <b>Alteration</b> | <b>MECA (n=37)</b> | <b>MECA de novo (n=15)</b> | <b>MECA Ex-PA (n=22)</b> | <b>P-value**</b> |
|--------------------------|-------------------|--------------------|----------------------------|--------------------------|------------------|
| 1pcen-p32.3              | Loss              | 6 (16%)            | 0 (0%)                     | 6 (27%)                  | ns.              |
| 1qcen-qter               | Gain              | 11 (30%)           | 1 (6.7%)                   | 10 (45%)                 | 0.014            |
| 5pter-pcen               | Gain              | 7 (19%)            | 3 (20%)                    | 4 (18%)                  | ns.              |
| 6qcen-qter               | Loss              | 8 (22%)            | 0 (0%)                     | 8 (36%)                  | 0.012            |
| 8*                       | Gain              | 16 (43%)           | 2 (13%)                    | 14 (64%)                 | 0.003            |
| 11pter-pcen              | Loss              | 7 (19%)            | 1 (6.7%)                   | 6 (27%)                  | ns.              |
| 16qcen-qter              | Gain              | 7 (19%)            | 2 (13%)                    | 5 (23%)                  | ns.              |

\* Gain of whole chromosome 8 or complex rearrangements (including ring formation).

\*\*Fisher's exact test.

**Supplementary Table 7.** Clinico-pathological characteristics and copy number alterations in 17 pleomorphic adenomas profiled by arrayCGH.

| Case No. | Diagnosis | Sex/Age | Location | Size (cm) | CNAs                                      |
|----------|-----------|---------|----------|-----------|-------------------------------------------|
| 1        | PA        | K/68    | PG       | 2         | No                                        |
| 2        | PA        | K/72    | PG       | 2.5       | No                                        |
| 3        | PA        | K/36    | PG       | 1.5       | No                                        |
| 4        | PA        | K/48    | PG       | 3         | No                                        |
| 5        | PA        | K/59    | PG       | 2.5       | No                                        |
| 6        | PA        | K/39    | PG       | 1.5       | No                                        |
| 7        | PA        | K/48    | PG       | 1.8       | No                                        |
| 8        | PA        | K/52    | PG       | 1.3       | No                                        |
| 9        | PA        | K/74    | PG       | 1.5       | No                                        |
| 10       | PA        | M/31    | PG       | 2.5       | No                                        |
| 11       | PA        | M/54    | PG       | 2         | No                                        |
| 12       | PA        | M/82    | PG       | 2.2       | No                                        |
| 13       | PA        | M/48    | PG       | 1.9       | No                                        |
| 14       | PA        | M/36    | PG       | 3.5       | Gain 16p13.11-p12.3<br>(3.4 Mb, 62 genes) |
| 15       | PA        | M/21    | PG       | 1.5       | No                                        |
| 16       | PA        | K/20    | PG       | 1.3       | No                                        |
| 17       | PA        | M/54    | PG       | 2.6       | No                                        |

PA, pleomorphic adenoma; PG, parotid gland.

**Supplementary Table 8.** Primer sequences.

| <b>Primer name</b>          | <b>Primer sequence (5'-3')</b> | <b>Nucleic acid</b> |
|-----------------------------|--------------------------------|---------------------|
| TGFBR3_PLAG1_F              | CTCTTCCCAGCGAGTGAAGG           | cDNA                |
| TGFBR3_PLAG1_R              | CATGCAAGGCCAAGTGACG            | cDNA                |
| FGFR1_PLAG1_F1              | AGGATCGAGCTCACTGTGGA           | cDNA                |
| FGFR1_PLAG1_R1              | TCCCATTGACTCTTCGTGGA           | cDNA                |
| FGFR1_PLAG1_F2              | AGGATCGAGCTCACTGTGGA           | cDNA                |
| FGFR1_PLAG1_R2              | TCCCATTGACTCTTCGTGGA           | cDNA                |
| MSN_ALK_F                   | ACAAGCGGATCTTGGCCTTG           | cDNA/DNA            |
| MSN_ALK_R                   | CGGACACCTGGCCTTCATAC           | cDNA/DNA            |
| EWSR1_ATF1_F                | TTGATCGTGGAGGCATGAGC           | cDNA                |
| EWSR1_ATF1_R                | TTGCCAACTGTAAGGCTCCA           | cDNA                |
| PLAG1_ND4_1F                | AGAACGTGGTTACTAGCACAGAG        | cDNA/DNA            |
| PLAG1_ND4_1R                | TGAGGTTTCTCCGATTCCAAC          | cDNA/DNA            |
| PLAG1_ND4_2F                | TTTGATCAGGAGAACGTGGTTA         | cDNA/DNA            |
| PLAG1_ND4_2R                | TTAAATATTGTGCTGTGCCCCATC       | cDNA/DNA            |
| PLAG1_ND4_3F                | GGGTAAGGCGAGGTTAGCGA           | cDNA/DNA            |
| PLAG1_ND4_3R                | GCGTTTTTCTGAACAGACAAGTAGC      | cDNA/DNA            |
| PLAG1_ND4_4F                | GGGTAAACGAGGGTGGTAAGG          | cDNA/DNA            |
| PLAG1_ND4_5F                | GGTATGGTTTTGAGTAGTCCTCC        | cDNA/DNA            |
| PLAG1_ND4_6F                | AGTAGGGTTAGGATGAGTGGGA         | cDNA/DNA            |
| GAPDH_F                     | GTCAAGGCTGAGAACGGGAA           | cDNA/DNA            |
| GAPDH_R                     | CCGTTCAGCTCAGGGATGAC           | cDNA/DNA            |
| <b>For quantitative PCR</b> |                                |                     |
| <b>Name</b>                 | <b>Primer sequence (5'-3')</b> | <b>Nucleic acid</b> |
| MSN_exon4_F                 | CGTGCCAAGTTCTACCCTGA           | cDNA                |
| MSN_exon4_R                 | GTCTCAGGCGGGCAGTAAAT           | cDNA                |
| MSN_exon10_F                | GGAACTTGAGCAGGAACGGA           | cDNA                |
| MSN_exon10_R                | GCCAGCTGTTCTGAGTCTT            | cDNA                |
| ALK_exon1-3_F               | TCCAGATCTTCGGGACTGGT           | cDNA                |
| ALK_exon1-3_R               | ACCATATCGGCTGCGATGAG           | cDNA                |
| ALK_exon29_F                | CAACACCGCTTTGCCGATAG           | cDNA                |
| ALK_exon29_R                | TCCCGTTTTGCCTGTTGAGA           | cDNA                |
| STLM_F                      | AAGCCAAAAGATGGGCAGGA           | cDNA                |
| STLM_R                      | GCTTCCTTCTCGACAGGGTC           | cDNA                |

**Supplementary Table 9.** FISH probes.

| Clone                                                     | Gene/Locus | Band          | Color  |
|-----------------------------------------------------------|------------|---------------|--------|
| <b><i>TGFBR3-PLAG1</i> (2-color fusion probe)</b>         |            |               |        |
| RP11-135F24                                               | 3'TGFBR3   | 1p22.2-1p22.1 | Red    |
| RP11-43G6                                                 | 3'TGFBR3   |               |        |
| RP11-77A10                                                | 5'TGFBR3   |               |        |
| RP11-28O2                                                 | 5'TGFBR3   |               |        |
| RP11-92A9                                                 | 5'PLAG1    | 8q12.1        | Green  |
| RP11-111I18                                               | 5'PLAG1    |               |        |
| RP11-246A9                                                | 3'PLAG1    |               |        |
| <b><i>MSN-ALK</i> (2-color fusion probe)</b>              |            |               |        |
| RP3-323B6                                                 | 5'MSN      | Xq12          | Red    |
| RP11-368D24                                               | MSN        |               |        |
| RP11-434B14                                               | 3'MSN      |               |        |
| RP11-484N8                                                | 3'MSN      |               |        |
| CTD-3049L15                                               | 3'ALK      | 2p23          | Green  |
| RP11-100C1                                                | 3'ALK      |               |        |
| RP11-701P18                                               | 5'ALK      |               |        |
| RP11-644H8                                                | 5'ALK      |               |        |
| <b><i>NKTR-PLAG1</i> (2-color fusion probe)</b>           |            |               |        |
| RP11-776E8                                                | 5'NKTR     | 3p22.1        | Red    |
| RP11-219I21                                               | 5'NKTR     |               |        |
| RP11-13K13                                                | 3'NKTR     |               |        |
| RP11-141M3                                                | 3'NKTR     |               |        |
| RP11-92A9                                                 | 5'PLAG1    | 8q12.1        | Green  |
| RP11-111I18                                               | 5'PLAG1    |               |        |
| RP11-246A9                                                | 3'PLAG1    |               |        |
| <b><i>NKTR-3'PLAG1-5'PLAG1</i> (3-color fusion probe)</b> |            |               |        |
| RP11-776E8                                                | 5'NKTR     | 3p22.1        | Green  |
| RP11-219I21                                               | 5'NKTR     |               |        |
| RP11-13K13                                                | 3'NKTR     |               |        |
| RP11-141M3                                                | 3'NKTR     |               |        |
| RP11-92A9                                                 | 5'PLAG1    | 8q12.1        | Orange |
| RP11-111I18                                               | 5'PLAG1    |               | Red    |
| RP11-246A9                                                | 3'PLAG1    |               |        |
| <b><i>TGFBR3-PLAG1-FGFR1</i> (3-color fusion probe)</b>   |            |               |        |
| RP11-135F24                                               | 3'TGFBR3   | 1p22.2-1p22.1 | Red    |
| RP11-43G6                                                 | 3'TGFBR3   |               |        |
| RP11-77A10                                                | 5'TGFBR3   |               |        |
| RP11-28O2                                                 | 5'TGFBR3   |               |        |
| RP11-92A9                                                 | 5'PLAG1    | 8q12.1        | Green  |
| RP11-111I18                                               | 5'PLAG1    |               |        |
| RP11-246A9                                                | 3'PLAG1    |               |        |
| RP11-350N15                                               | FGFR1      | 8p11          | Orange |

## References, Supplementary information

1. Ben Lassoued A, Nivaggioni V, Gabert J. Minimal residual disease testing in hematologic malignancies and solid cancer. *Expert review of molecular diagnostics* **14**, 699-712 (2014).
2. Mitelman F JBaMF. Mitelman Database of Chromosome Aberrations and Gene Fusions in Cancer (2016). (ed<sup>^</sup>(eds).
3. Rettig EM, *et al.* Whole-Genome Sequencing of Salivary Gland Adenoid Cystic Carcinoma. *Cancer prevention research (Philadelphia, Pa)* **9**, 265-274 (2016).
4. Mitani Y, *et al.* Novel MYBL1 Gene Rearrangements with Recurrent MYBL1-NFIB Fusions in Salivary Adenoid Cystic Carcinomas Lacking t(6;9) Translocations. *Clinical cancer research : an official journal of the American Association for Cancer Research* **22**, 725-733 (2016).
5. Brayer KJ, Frerich CA, Kang H, Ness SA. Recurrent Fusions in MYB and MYBL1 Define a Common, Transcription Factor-Driven Oncogenic Pathway in Salivary Gland Adenoid Cystic Carcinoma. *Cancer discovery* **6**, 176-187 (2016).
6. Ho AS, *et al.* The mutational landscape of adenoid cystic carcinoma. *Nature genetics* **45**, 791-798 (2013).
7. Dalin MG, *et al.* Comprehensive Molecular Characterization of Salivary Duct Carcinoma Reveals Actionable Targets and Similarity to Apocrine Breast Cancer. *Clinical cancer research : an official journal of the American Association for Cancer Research* **22**, 4623-4633 (2016).
8. Weinreb I, *et al.* Hotspot activating PRKD1 somatic mutations in polymorphous low-grade adenocarcinomas of the salivary glands. *Nature genetics* **46**, 1166-1169 (2014).
