# Supplementary material for: Multi-dimensional genomic analysis of myoepithelial carcinoma identifies prevalent oncogenic gene fusions
Source: PubMed Central journal article supplement (PMC5662567; doi:10.1038/s41467-017-01178-z), 2017-10-30
Supplement: 41467_2017_1178_MOESM3_ESM.pdf [file 41467_2017_1178_MOESM3_ESM.pdf]

## **Description of Additional Supplementary Files**

File Name: Supplementary Data 1

Description: All somatic mutations in cohort 1

File Name: Supplementary Data 2

Description: Somatic mutations in cancer-related genes, cohort 2

File Name: Supplementary Data 3

Description: Copy number alterations
